1 **The polymicrogyria-associated *GPR56* promoter preferentially drives gene**  
2 **expression in developing GABAergic neurons in common marmosets**

3

4 Ayako Y Murayama<sup>1, 2</sup>, Ken-ichiro Kuwako<sup>1, 3</sup>, Junko Okahara<sup>2, 4</sup>, Byoung-Il Bae<sup>5, †</sup>,  
5 Misako Okuno<sup>2</sup>, Hiromi Mashiko<sup>6, ††</sup>, Tomomi Shimogori<sup>6</sup>, Christopher A Walsh<sup>5, 7, 8</sup>,  
6 Erika Sasaki<sup>2, 4</sup>, Hideyuki Okano<sup>1, 2</sup>

7

8 1. Department of Physiology, Keio University School of Medicine, Tokyo, Japan

9 2. Laboratory for Marmoset Neural Architecture, Center for Brain Science, RIKEN,

10 Wako, Japan

11 3. Department of Neural and Muscular Physiology, Shimane University School of

12 Medicine, Izumo, Japan

13 4. Center Institute of Experimental Animals, Kawasaki, Japan

14 5. Division of Genetics and Genomics, Manton Center for Orphan Disease Research,

15 and Howard Hughes Medical Institute, Boston Children's Hospital, Boston, MA, USA.

16 6. Laboratory for Molecular Mechanisms of Brain Development, Center for Brain  
17 Science, RIKEN, Wako, Japan

18 7. Broad Institute of MIT and Harvard, Cambridge, MA, USA.

19 8. Departments of Pediatrics and Neurology, Harvard Medical School, Boston, MA,

20 USA.

21

22 † Current addresses: Department of Neuroscience, University of Connecticut School of

23 Medicine, Farmington, CT, USA

24 †† Current addresses: Molecular Analysis for Higher Brain Function, Center for Brain

25 Science, RIKEN, Wako, Japan

26 Ken-ichiro Kuwako and Junko Okahara are joint second authors.

27 Correspondence and requests for materials should be addressed to E.S. (email:

28 esasaki@cica.jp) and H.O. (email: hidokano@keio.jp)

29

30 **ABSTRACT**

31 GPR56, a member of the adhesion G protein-coupled receptor family, is abundantly  
32 expressed in cells of the developing cerebral cortex, including neural progenitor cells  
33 and developing neurons. The human *GPR56* gene has multiple presumptive promoters  
34 that drive the expression of the GPR56 protein in distinct patterns. Similar to coding  
35 mutations of the human *GPR56* gene that may cause GPR56 dysfunction, a 15-bp  
36 homozygous deletion in the cis-regulatory element upstream of the noncoding exon 1 of  
37 *GPR56* (*e1m*) leads to the cerebral cortex malformation and epilepsy. To clarify the  
38 expression profile of the *e1m* promoter-driven GPR56 in primate brain, we generated a  
39 transgenic marmoset line in which EGFP is expressed under the control of the human  
40 minimal *e1m* promoter. In contrast to the endogenous GPR56 protein, which is highly  
41 enriched in the ventricular zone of the cerebral cortex, EGFP is mostly expressed in  
42 developing neurons in the transgenic fetal brain. Furthermore, EGFP is predominantly  
43 expressed in GABAergic neurons, whereas the total GPR56 protein is evenly expressed  
44 in both GABAergic and glutamatergic neurons, suggesting the GABAergic  
45 neuron-preferential activity of the minimal *e1m* promoter. These results indicate a  
46 possible pathogenic role for GABAergic neuron in the cerebral cortex of patients with  
47 *GPR56* mutations.

48

## 49 INTRODUCTION

50 G protein-coupled receptor 56 (GPR56) is a member of the adhesion G protein-coupled  
51 receptor family<sup>1,2</sup>, and is expressed in multiple tissues including brain, colon, lung,  
52 muscle, kidney, pancreas and testis<sup>1</sup>. In the nervous system, GPR56 is highly expressed  
53 in neural progenitor cells, and is also expressed in developing neurons<sup>2,3,4,5</sup>. Previous  
54 studies have clearly demonstrated the crucial roles of GPR56 in cortical development.  
55 In the developing brain, neural stem cells proliferate in the ventricular zone (VZ), and  
56 their daughter cells migrate along radial glial fibers toward the pial basement membrane,  
57 developing into excitatory glutamatergic neurons. Glutamatergic neurons are generated  
58 from deep layer (VI) to upper layer (II) in a birthdate-dependent, inside-out manner. In  
59 contrast, GABAergic interneurons originate from the VZ of the ganglionic eminence  
60 (GE) and migrate tangentially in multiple streams<sup>6</sup>. Loss of *Gpr56* in mice causes many  
61 cellular abnormalities in the cerebral cortex, including reduced proliferation of neuronal  
62 progenitor cells<sup>7</sup>, structural aberrations in the radial glial endfeet and pial basement  
63 membrane, mislocalization of Cajal–Retzius cells, and overmigration of developing  
64 neurons<sup>8</sup>. Consequently, *Gpr56*-deficient mice exhibit disorganized cortical lamination  
65 and a cobblestone-like malformation<sup>8</sup>. Collagen III  $\alpha$ -1, one of the ligands of *Gpr56*  
66 expressed in the pial basement membrane, is a key molecule involved in  
67 *Gpr56*-mediated neuronal radial migration in the cortex<sup>9</sup>. Upon binding of collagen III,  
68 *Gpr56* associates with G $\alpha$ 12/13 family of G proteins and activates the RhoA pathway in  
69 the radially migrating neurons, leading to properly controlled termination of migration<sup>9</sup>.  
70 *Gpr56* also plays roles in the proliferation of oligodendrocyte precursor cells and the  
71 development and maintenance of peripheral myelin<sup>10,11</sup>.

72 Consistent with the defects observed in *Gpr56*-deficient mice, multiple *GPR56*  
73 coding mutations in human have been found to cause a devastating cortical  
74 malformation called bilateral frontoparietal polymicrogyria, as well as frontal  
75 lobe-associated dysfunctions, such as epilepsy<sup>2</sup>. The human *GPR56* gene has at least 17  
76 alternative transcription start sites that may drive transcription of mRNAs with different  
77 noncoding first exons; these mRNAs encode identical GPR56 protein with distinct  
78 expression profiles in the brain<sup>7</sup>. A 15-bp deletion within a cis-regulatory element  
79 upstream of the transcriptional start site of noncoding exon 1m (e1m) of *GPR56* has  
80 recently been identified in individuals with polymicrogyria restricted to the regions  
81 around the Sylvian fissure<sup>7</sup>. All patients with this 15-bp deletion suffer from epilepsy

82 from a young age, as well as from intellectual and language difficulties, but without  
83 evident motor disabilities. Epilepsy in patients with the GPR56 mutation is often  
84 drug-resistant. Recently, Vigabatrin,  $\gamma$ -vinyl-GABA (a structural analogue of GABA),  
85 has been reported to be an effective epilepsy treatment for GPR56-mutated patients<sup>12</sup>.  
86 The mechanism of action of Vigabatrin is known to be different from that of GABA<sub>A</sub>R  
87 activators such as benzodiazepines and barbiturates, but other details are unknown. The  
88 deleted 15-bp sequence is conserved among placental mammals, suggesting a major  
89 regulatory element for *GPR56* expression. Given that the patients with the 15-bp  
90 deletion in the cis-regulatory element of e1m promoter show a milder and more  
91 restricted malformation of the brain-compared to patients with coding mutations (which  
92 appear to be null mutations), a detailed expression profile of e1m promoter in the  
93 cerebral cortex may provide an important insight into the cell types that are responsible  
94 for cortical malformation and related symptoms. However, the cell type profile of e1m  
95 promoter-driven GPR56 has yet to be characterized.

96 The common marmoset (*Callithrix jacchus*) has gained prominence as an  
97 experimental animal model in the neuroscience field, due to their human-like behaviors  
98 and brain structure<sup>13,14,15</sup>. Socially, marmosets form a unit of a close-knit family based  
99 on a pair of one male and one female, which is not observed in other experimental  
100 model primates, and communicates each other closely through vocalization and  
101 eye-contact<sup>16</sup>. In addition, marmoset brain shares structural similarity with human brain,  
102 such as the Sylvian fissure and calcarine sulcus, although marmoset is a  
103 near-lissencephalic primate<sup>17,18,19,20</sup>. Furthermore, genetics approaches are available  
104 thanks to the generation and successful germline transmission of transgenic  
105 marmoset<sup>21,22</sup>. This technique enables significant advancements potentially useful in the  
106 study of neurological and psychiatric disorders<sup>13,23</sup>.

107 In the present study, we generated a transgenic marmoset expressing a 0.3-kbp  
108 human *GPR56* e1m promoter-driven EGFP (enhanced green fluorescence protein) and  
109 provide evidence for preferential activity of the e1m promoter in GABAergic neurons in  
110 the developing cerebral cortex, whereas the total GPR56 protein is evenly expressed in  
111 GABAergic and glutamatergic neurons as well as progenitor cells. These findings imply  
112 a possible role for GABAergic neurons in *GPR56* mutation-associated epilepsy.

## 113 RESULTS

### 114 Production of transgenic marmosets expressing EGFP under the control of human 115 *GPR56 e1m* promoter

116 To investigate how mutations or deletions within a cis-regulatory element upstream of  
117 the e1m of human *GPR56* leads to symptoms in patients, we sought to characterize the  
118 cells expressing *GPR56* under the control of this cis-regulatory element in marmoset.  
119 For this purpose, we generated transgenic marmosets expressing enhanced green  
120 fluorescence protein (EGFP) driven by the cis-regulatory element. A previous study  
121 reported that 0.3 kb sequence upstream of the human e1m acts as a minimum promoter  
122 of the *GPR56* during embryonic stage<sup>7</sup>. The relevant human and marmoset sequences  
123 share 92.4% identity, while human and mouse sequences share 62.1% identity in this  
124 region (Fig. S1). Regarding the 15-bp element, human and marmoset differ by two  
125 bases, while human and mouse differ by one base (Fig. S1). We constructed  
126 self-inactivating lentiviral vector harboring this 0.3 kb sequence followed by EGFP  
127 coding sequence (referred to hereafter as *0.3k hGPR56 e1m*-EGFP vector) (Fig. 1A).  
128 Marmoset zygotes were obtained by *in vitro* fertilization (IVF). Forty-one zygotes were  
129 injected with high titer lentiviral vector carrying the *0.3k hGPR56 e1m*-EGFP, of which  
130 27 (65.9%) developed beyond the 4-cell stage (Table 1). Because the *hGPR56* e1m  
131 promoter was not active in marmoset preimplantation embryos, the transgene-positive  
132 embryos could not be selected by EGFP fluorescence (Fig. S2A), all 27 embryos  
133 developed beyond the 4-cell stage were transplanted into 11 recipient females at various  
134 developmental stages (Table 1). Five recipient females became pregnant (45.5%) and  
135 ultimately two newborns (7.4%. two singletons; one female (I651TgF)) and one male  
136 (I757TgM) were delivered naturally at full term (Fig. 1B).

137

### 138 Transgene integration in the genome

139 We first examined the genomic integration of the transgene in the infant marmosets.  
140 The presence of transgene was tested by PCR using genomic DNA purified from  
141 placenta delivered with I651TgF and I757TgM and hair roots of I651TgF and I757TgM.  
142 Integrated transgene was detected in all samples (Fig. 1C). Furthermore, EGFP  
143 transcripts were detected in hair cells of both infants and in placenta delivered with  
144 I651TgF, but not in placenta delivered with I757TgM (Fig. 1D). To identify the  
145 chromosomal transgene integration sites, fluorescence *in situ* hybridization (FISH) was

146 performed. There were 27 transgene integration sites on chromosomes 1, 2, 3, 4, 9, 10,  
147 11, 13, 15, 17, 18, 21 and 22 in the peripheral blood cells of I651TgF, while I757TgM  
148 had 13 transgene integration sites on chromosomes 1, 2, 4, 6, 7, 11, 13, 15, 16 and 17  
149 (Fig. S2B) . These results indicate that I757TgM and I651TgF are transgenic  
150 marmosets harboring functional *0.3k hGPR56 e1m*-EGFP transgene in their genome.

151

### 152 **Germline transmission of the transgene**

153 After sexual maturation, the female animal (I651TgF) was mated with a non-transgenic  
154 male and 19 embryos were obtained by uterine flushing. Sixteen of these were  
155 transferred into eight surrogate mothers (Table 2) , and then three F1 fetuses at E95, two  
156 at E113, and one at E126 were obtained by caesarean section. EGFP fluorescent signals  
157 were detected in all fetuses (Fig. 3A, Fig. 4A, Fig. S3A, B), implying that transgenes  
158 were transmitted through oocytes of I651TgF. As for I757TgM, the presence of  
159 transgene was detected in the sperm sample by genomic PCR (Fig. S3C). On the other  
160 hand, we paired the male transgenic marmoset, I757TgM, with wild-type female and  
161 performed uterine flushing to obtain embryos. Although the sperm concentration and  
162 motility were normal in the semen of I757TgM, no zygotes were obtained from the  
163 I757TgM line for unknown reasons (Table 2).

164

### 165 **Expression pattern of endogenous GPR56 and *0.3k hGPR56 e1m*-driven EGFP in 166 the embryonic brain**

167 GPR56 is expressed in various tissues including brain in human and mouse<sup>7</sup>. We  
168 confirmed broad expression of GPR56 in embryonic marmoset brain by *in situ*  
169 hybridization. At the 10th, 12th and 14th embryonic week (EW), strong GPR56 signals  
170 were detected in VZ, mainly consisting of neural stem cells. At the 14th EW, GPR56  
171 was also strongly expressed in outer subventricular zone (oSVZ), where the highly  
172 proliferative progenitor cells called basal radial glia reside (Fig. 2 and Fig. S4)<sup>24,25,26</sup>.

173 These results suggest abundant *GPR56* mRNA expression in immature neural cells.

174 In the F1 fetus brain at E95, *0.3k hGPR56 e1m*-driven EGFP protein expression was  
175 observed in restricted areas, such as thalamus, hypothalamus, midbrain, cerebral cortex  
176 (Fig. 3A). In order to determine the EGFP expression pattern in more detail, we  
177 prepared brain slices from E95 transgenic marmoset embryos in the coronal plane and  
178 stained them with anti EGFP antibody. The signals were mainly detected in cerebral

179 cortex, cingulum, early caudate nucleus, early putamen, hippocampus, and  
180 hypothalamus (Fig. 3B). In the cerebral cortex, EGFP signals were found in a  
181 subpopulation of cells in the cortical plate, as well as in most of the nerve fibers in the  
182 subplate and intermediate zone (Fig. 3C). Interestingly, only a few EGFP-positive cells  
183 were sparsely distributed in inner subventricular zone (iSVZ) and oSVZ in the cerebral  
184 cortex and subventricular zone of the early caudate nucleus and no EGFP-positive cell  
185 was found in VZ in the cerebral cortex or VZ of the early caudate nucleus (Fig. 3D),  
186 despite the high expression of endogenous *GPR56* mRNA in these zones (Fig 2). Taken  
187 together, these results suggest that *0.3k hGPR56 e1m* contains a cis-element that  
188 promotes predominant expression of GPR56 in the GE and in a subset of developing  
189 neurons in the cortical plate of the marmoset fetus brain.

190

### 191 **EGFP expressed predominantly in GABAergic neurons**

192 To determine the cell types that express *0.3k hGPR56 e1m*-driven EGFP in developing  
193 cortex, we performed immunohistochemistry with the cerebral sections at E113, as all  
194 layers in CP became distinguishable at this developmental stage. We first confirmed the  
195 reactivity of anti-pan-GPR56 antibody with marmoset GPR56 by immunofluorescence  
196 using COS cells expressing marmoset GPR56 (Fig. S5). Then, we stained coronal  
197 sections with anti-EGFP and anti-pan-GPR56 antibodies and overviewed the sections  
198 from rostral to caudal. Similar to at stage E95, EGFP signals were mainly detected in  
199 cerebral cortex, cingulum, caudate nucleus, putamen, globus pallidus, hippocampus,  
200 hypothalamus and cerebellum, while the pan-GPR56 signals were also strongly  
201 observed in VZ and oSVZ (Fig. 4A and 4B). In the cortical plate,  
202  $89.6\% \pm 1.1$  (mean  $\pm$  SEM) of the EGFP positive cells (1278 cells in the 10 sections  
203 derived from 2 embryos) were positive for pan-GPR56 staining. Next, we examined the  
204 distribution of EGFP-positive cells in each cortical layer of two transgenic marmosets,  
205 no.1 and no.2. EGFP-positive cells were detected in all layers at various ratios, and  
206 were most abundant in the layer V (Fig. 4D and Table S1). We evaluated the ratio of  
207 excitatory and inhibitory neurons among EGFP-positive cells by staining GABA and  
208 CTIP2, markers for GABAergic inhibitory neurons and for glutamatergic excitatory  
209 neurons in deep layer (layer V and VI)<sup>27</sup>, respectively (Fig. 4B, 4C, 4E, 4F, Fig. S6 and  
210 Table S2). In layer V of E113 marmosets, on average, 70.0% and 28.1% of *0.3k*  
211 *hGPR56 e1m*-driven EGFP cells were GABA-positive and CTIP2-positive, respectively

212 (Fig. 4E and Table S2). In contrast, among pan-GPR56 positive cells in layer V of  
213 marmosets at E113, 40.3% and 49.1% on average were GABA-positive and  
214 CTIP2-positive, respectively (Fig. 4F and Table S2). These results suggest that the  
215 *hGPR56 e1m* drives protein expression preferentially in GABAergic neurons rather than  
216 glutamatergic neurons in layer V. In other layers of cortical plate, EGFP-positive cells  
217 contained a higher percentage of GABAergic neurons than pan-GPR56 positive cells  
218 (Fig. S7, Table S3 and S4). At E89, an earlier stage, pan-GPR56 positive cells included  
219 almost all Nkx2.1 positive progenitor cells in presumptive MGE (medial ganglionic  
220 eminence), from which GABAergic neurons originate (Fig. S8A)<sup>28</sup>. At E95, EGFP  
221 positive migrating neurons were observed beneath and within the intermediate zone (Fig.  
222 S8B). These findings are consistent with the fact that *hGPR56 e1m* drives protein  
223 expression preferentially in GABAergic neurons. Furthermore, we examined the  
224 subtype of the EGFP-positive GABAergic interneurons by analyzing the expression of  
225 the principal subtype markers, such as parvalbumin (PV), somatostatin (SST), or  
226 calretinin (CR) (Fig. 5A). Of the EGFP-expressing cells in layer V, 50.0% (n=152) on  
227 average was PV-positive, 20.0% (n=236) was SST-positive, and 21.9% (n=321) was  
228 CR-positive neuron (Fig. 5B and Table S5). While at E113, PV-positive, SST-positive,  
229 and CR-positive neurons were found at 34.7% (n=471), 9.2% (n=218), and 10.6%  
230 (n=405) of whole cells in layer V, respectively (Fig. 5C and Table S6). These results  
231 suggest that the subtype distribution PV:SST:CR among EGFP-positive cells in layer V  
232 did not differ significantly from that of the entire cell population in layer V. Taken  
233 together, we conclude that cis-element within a *hGPR56 e1m* region contributes to  
234 promote GPR56 expression in broad subtypes of GABAergic neurons.



235 **DISCUSSION**

236 In this study, we examined the role of human *GPR56* e1m minimum promoter by using  
237 marmoset as a nonhuman primate model. We developed transgenic marmosets in which  
238 EGFP is expressed under the control of human *GPR56* e1m minimum promoter, and  
239 examined the profile of EGFP positive cells, especially within the cerebral cortex. In  
240 developing marmoset brain, *0.3k hGPR56 e1m*-EGFP showed restricted expression  
241 pattern within the endogenous GPR56 expressing regions. While endogenous GPR56  
242 expressed in immature cells including neural stem cells and progenitors, *0.3k hGPR56*  
243 *e1m*-EGFP expression was rarely detected in such immature cells but detected mainly in  
244 developing neurons. These results are consistent with the expression patterns of  
245 endogenous mouse *Gpr56* and *0.3k hGPR56 e1m*-driven reporter gene in the transgenic  
246 mice<sup>7</sup>. We further showed that EGFP in layer V was preferentially expressed in  
247 GABAergic neurons. It is well known that, in the developing brain, the anti-CTIP2  
248 antibody preferentially labels a relatively narrow population of cells in layer V of the  
249 cerebral cortex. Our present study showed that EGFP<sup>+</sup> cells in layer V contained a  
250 higher percentage of GABAergic neurons and a lesser percentage of CTIP2<sup>+</sup> cells than  
251 pan-GPR56<sup>+</sup> cells, where the summed percentage of CTIP2<sup>+</sup> cells and GABA<sup>+</sup> cells was  
252 similar (about 90%) to the EGFP<sup>+</sup> cells in layer V (Fig. 4E and F). Our data indicates  
253 that, even if all of the GABA<sup>-</sup> EGFP<sup>+</sup> cells in layer V were glutamatergic neurons,  
254 EGFP<sup>+</sup> cells should contain a higher percentage of GABAergic neurons than that of  
255 glutamatergic neurons in layer V (Fig. 4E). GPR56 is classified into adhesion GPRs<sup>29</sup>  
256 that are involved in cell proliferation and migration in the developing brain. Among the  
257 genes that mainly contribute to the cell migration of neocortex, homeobox transcription  
258 factor DLX families and ARX, which is regulated under DLX, are also involved in  
259 differentiation of GABAergic inhibitory neurons at embryonic stages<sup>30,31</sup>. Similar to the  
260 case for DLX and ARX, our result suggested that GPR56 expression regulated under  
261 the control of the e1m minimal promoter may also contribute to migration and  
262 development of GABAergic neurons.

263 We examined the distribution of principle each subtypes of GABAergic interneurons  
264 among the *0.3k hGPR56 e1m*-EGFP positive neurons, and showed that the ratio of  
265 PV-positive cells was about two times higher than those of SST-or CR-positive cells.  
266 These ratios are roughly consistent with those among the GABAergic neurons in  
267 marmoset cortical layer V (Fig. 5B and C). Therefore, it appears that e1m cis-element

268 drives GPR56 expression in GABAergic neurons irrespective of subtype. This may  
269 indicate that GPR56 driven by e1m cis-element plays a role in the earlier development  
270 of GABAergic neuron before its subtype determination<sup>32</sup>. Taken together, our results  
271 support the idea that 15bp deletion within e1m cis-element may reduce the expression  
272 of GPR56 in GABAergic neurons in human developing brain.

273 The preferential expression of e1m-driven EGFP in inhibitory interneurons, and in the  
274 early developing ganglionic eminence and later early caudate nucleus is most simply  
275 explained by the observation that most inhibitory interneurons originally derive from  
276 the several GE's, including the medial, caudal, and lateral ganglionic eminences. Thus,  
277 the e1m element may drive EGFP expression in the progenitor cells of interneurons in  
278 the GE during development, as well as in the inhibitory interneurons derived from these  
279 structures. In fact, studies in mice suggest that disruption of the e1m element causes a  
280 prominent loss of expression in developing GE<sup>7</sup>, consistent with some of our  
281 observations here. On the other hand, mutation of the e1m element in mice also disrupts  
282 transgene expression in lateral cerebral cortical cells as well, which is less well  
283 illustrated by our marmoset transgene. The splice structure of GPR56 is quite dynamic  
284 between mouse and primates, and some of these changes may be responsible for these  
285 species differences; alternatively they may reflect technical differences in the precise  
286 elements of the transgenes used. Since the anti pan-GPR56 antibody recognizes all of  
287 the GPR56 isoforms, it is expected that all EGFP-positive cells would also be labeled  
288 with the panGPR56 antibody. Indeed, nearly 90% of the EGFP positive cells were  
289 positive for pan-GPR56 staining. The remaining EGFP positive cells were negative for  
290 the pan-GPR56 signal. This could be explained by the difference in sensitivity between  
291 anti-GFP and anti-panGR56 antibodies, although some other regulatory elements may  
292 be required to fully recapitulate endogenous marmoset *GPR56* gene expression. Until  
293 now, only a few genes have been found, in which mutations in non-coding regions  
294 cause epilepsy. For example, the product of *SCN1A* gene is voltage-gated sodium  
295 channel Nav1.1 that expresses in GABAergic neuron<sup>33,34,35</sup>. Mutations in its promoter  
296 region are reported to reduce *SCN1A* transcription, which causes SCN1A  
297 haploinsufficiency. Accordingly, the reduced sodium currents in GABAergic inhibitory  
298 neurons may cause hypoexcitability of inhibitory neurons, leading to epilepsy<sup>36</sup>. It is  
299 unclear how the deletion within the hGPR56 e1m non-coding region led to epilepsy. An  
300 attractive hypothesis would be that, in the case of GPR56, the 15-bp deletion in the

301 cis-regulatory element upstream of the non-coding exon 1m produces intact GPR56  
302 protein<sup>7</sup>, but leads to inaccurate temporal and/or spatial expression of GPR56 in  
303 GABAergic neurons along with any potential effects on the development of  
304 glutamatergic neurons. Dysfunction of GABAergic neuron development is frequently  
305 associated with epilepsy such as with mutations in *DLX* and *ARX*<sup>30,31</sup>. In human, exon  
306 1m of *GPR56* gene is highly expressed in fetal brain compared to the adult brain<sup>7</sup>.  
307 Therefore, pathogenic mechanisms of epilepsy associated with patients with a 15-bp  
308 deletion within e1m region may be explained in part by the developmental abnormality  
309 or dysfunction of GABAergic neurons. Indeed, vigabatrin, a GABA-transaminase  
310 inhibitor that is used as an antiepileptic drug, has been reported to relieve symptoms in  
311 patients with mutations in *GPR56* gene<sup>12</sup>. Further understanding of the function of  
312 GPR56 in GABAergic neurons will help to reveal the precise pathogenic mechanism of  
313 epilepsy associated with mutations of *GPR56* gene.

314 **Methods**

315 **Animals**

316 Experimental procedures were approved by the Animal Care and Use Committees of  
317 RIKEN (H30-2-214(3)) and CIEA (11028, 14029, and 15020), and were performed in  
318 accordance with their guidelines. Adult common marmosets were obtained from  
319 marmoset breeding colonies in CIEA and RIKEN for experimental animals.

320

321 **Plasmid constructs and lentiviral production**

322 To construct the *0.3k hGPR56 e1m*-EGFP lentivirus vector plasmid, human *GPR56 e1m*  
323 promoter (*0.3k hGPR56 e1m*) was obtained from the plasmid pGL3E-*hGPR56*  
324 *e1m*-LacZ<sup>7</sup>. CMV promoter sequence of the lentiviral backbone vector,  
325 pCS-CDF-CG-PRE (RDB04379, RIKEN, Tsukuba, Japan; a gift from Hiroyuki  
326 Miyoshi), was replaced with the *0.3k hGPR56 e1m* promoter. Packaging plasmids,  
327 pCAG-HIVgp (mRDB04394) and pCMV-VSV-G-RSV-Rev (RDB04393), were also  
328 gifts from Hiroyuki Miyoshi. Lentiviral vector was produced following previously  
329 described procedures<sup>37</sup>. In particular, we transfected 30 µg of 0.3 k hGPR56 e1m-EGFP  
330 plasmid along with 20 µg HIVgp and 20 µg VSV-G-RSV-Rev packaging plasmids into  
331 semi-confluent HEK293T cells in a T175 flask coated with poly-ornitine, using  
332 GeneJuice Transfection Reagent (Merck Millipore) according to the manufacturer's  
333 instructions. Six to twelve hours after the transient transfection and the culture at 37° C  
334 in a 5% CO<sub>2</sub> incubator, the medium was replaced with 30 ml FreeStyle 293 Expression  
335 Medium (Thermo Fisher Scientific). After 3 days, the culture supernatant containing  
336 viral particles was collected, filtered through a membrane with a 0.22 µ m pore size  
337 (EMD Millipore, Darmstadt, Germany), and concentrated by ultracentrifugation at  
338 25,000g for 2 hours at 4°C. The viral pellet was then resuspended in 10 µl of ISM1.

339

340 ***In vitro* fertilization, early embryo collection, and transplantation**

341 *In vitro* fertilization (IVF) was performed as previously described<sup>21,22</sup>. Donor females'  
342 ovaries were stimulated by intramuscularly injected with human follicle-stimulating  
343 hormone (rhFSH, 25IU; FOLYRMON-P injection, Fuji Pharma Co, Tokyo, Japan) for  
344 nine days and human chorionic gonadotropin (hCG, 75IU; Gonatropin, ASKA  
345 Pharmaceutical Co, Tokyo, Japan) intramuscular injection on day ten then oocytes were  
346 collected via follicular aspiration. Collected oocytes were incubated for 24 h at 38°C,

347 5% CO<sub>2</sub>, 90% N<sub>2</sub> for in vitro maturation. After incubation, only matured oocytes  
348 (metaphase II) were collected and used for IVF. Ejaculated semen was collected  
349 non-invasively as described previously<sup>38</sup>. One-cell stage fertilized embryos with two  
350 pronuclei were placed in 0.25 M sucrose supplemented PB1 medium (LSI Chemical  
351 Medience Corporation, Tokyo, Japan) and the viruses were injected into the  
352 perivitelline space using an Eppendorf FemtoJet Express and a Narishige  
353 micromanipulator. After cultured beyond 4-cell stage, embryos were transferred to  
354 recipient females that had been paired with vasectomized males. After embryo transfer,  
355 the recipients were monitored for pregnancy by measuring their plasma progesterone  
356 until the pregnancies could be monitored by ultrasound through an abdominal wall.

357

### 358 **Caesarean section**

359 To collect transgenic fertilized embryos from transgenic female I651TgF, subjected to  
360 embryo transfer, were paired with intact males for natural embryo collection by  
361 nonsurgical uterine flushing. To obtain transgenic embryos at stages E95, 113 and 126,  
362 Caesarian Sections were performed in a similar manner as previously described<sup>39</sup>. The  
363 pregnant mothers were pre-anesthetized with 0.04 mg/kg medetomidine (Domitor;  
364 Nippon Zenyaku Kogyo, Fukushima, Japan), 0.40 mg/kg midazolam (Dormicam;  
365 Astellas Pharma Inc, Tokyo, Japan) and 0.40 mg/kg butorphanol (Vetorphale; Meiji  
366 Seika Pharma Co, Tokyo, Japan). For maintenance anesthesia during the operation,  
367 animals were inhaled 1-3% isoflurane (Forane; Abbott Japan, Tokyo, Japan) via a  
368 ventilation mask. After the operation, 0.20 mg/kg antisedan (Atipamezole; Nippon  
369 Zenyaku Kogyo, Fukushima, Japan) was injected as an  $\alpha_2$  adrenergic receptor  
370 antagonist. On the other hand, to obtain wild type embryos, caesarian sections were  
371 performed as previously described<sup>26</sup>. The pregnant mothers were intramuscularly  
372 injected with 10  $\mu$ g/head of atropine sulfate (0.5 mg/ml; Mitsubishi Tanabe Pharma  
373 Corporation, Osaka, Japan) followed by with 10 mg/kg of ketamine hydrochloride  
374 (Daiichi Sankyo, Tokyo, Japan). 1-3% isoflurane was used for maintenance anesthesia.  
375 The embryo and placenta were removed from the uterine by midline laparotomy and  
376 then the uterus, abdominal muscles, and skin were sutured. Embryos were anesthetized  
377 on ice deeply, dissected in PBS, and the whole brain was removed from the skull.

378

### 379 **Genomic PCR**

380 Genomic DNA was extracted from tissues of wild type (negative control), CMV-EGFP  
381 transgenic (positive control) and *0.3k hGPR56 elm*-EGFP transgenic marmosets using  
382 AllPrep DNA/RNA Micro Kit (QIAGEN, Hilden, Germany). For sperm genomic PCR,  
383 the CMV-EGFP plasmid (pEGFP; Clontech, CA, USA) was used as a positive control,  
384 and the genomic DNA extracted from marmoset ES cells was used as a negative control.  
385 They were subject to PCR for transgene detection using the EGFP5-4  
386 (5'-CAAGGACGACGGCAACTACAAGACC-3') and EGFP3-3es (5'-  
387 GCTCGTCCATGCCGAGAGTGA-3') primers. To detect  $\beta$ -actin gene, nested PCR  
388 was carried out using the first primer set  $\beta$ -actin 003  
389 (5'-TGGACTTCGAGCAGGAGAT-3') and  $\beta$ -actin 006R  
390 (5'-CCTGCTTGCTGATCCACATG-3'). PCR was performed for 35 cycles of  
391 denaturation at 98 °C for 10 sec, annealing at 65 °C for 10 sec, and elongation at 72 °C  
392 for 30 sec.

393

#### 394 **RT-PCR**

395 To detect the transgene expression, total RNA was prepared from each tissue and was  
396 reverse-transcribed by the SuperScript III First-Strand Synthesis System (Thermo  
397 Fisher Scientific). PCR was performed using the EGFP5-4  
398 (5'-CAAGGACGACGGCAACTACAAGACC-3') and EGFP3-3es (5'-  
399 GCTCGTCCATGCCGAGAGTGA-3') primers to detect EGFP gene expression in the  
400 tissues, as previous described<sup>21</sup>. To detect  $\beta$ -actin expression for internal transcript  
401 control, the nested PCR was carried out using the first primer set  $\beta$ -actin 003  
402 (5'-TGGACTTCGAGCAGGAGAT-3') and  $\beta$ -actin 006R  
403 (5'-CCTGCTTGCTGATCCACATG-3'). All PCR was performed for 35 cycles of  
404 denaturation at 98°C for 10 sec, annealing at 65°C for 10 sec, and elongation at 72°C for  
405 30 sec.

406

#### 407 **Karyogram analysis**

408 Fluorescent in situ hybridization (FISH) was performed as previously reported (Sasaki  
409 et al., 2009) (Chromosome Science Labo Inc, Sapporo, Japan). Peripheral blood  
410 samples were obtained from each founder animals. DNA fragment corresponding to a  
411 part of the *0.3k hGPR56 elm*-EGFP was used to produce Cy3-dUTP-labelled probe by

412 the Nick translation method. The common signals among many cells were determined  
413 as the insertion sites of *hGPR56 e1m*-EGFP DNA.

414

#### 415 ***in situ* hybridization**

416 To generate hybridization probe, about 500 bp cDNA fragment corresponding to 3'  
417 non-coding region of marmoset *GPR56* mRNA was PCR amplified using a cDNA pool  
418 derived from marmoset embryonic brain as a template and a set of primers,  
419 5'-ATTCCAATGCTATTTTGC GGGACGTG-3' and  
420 5'-CAGTTTGT TAGGCAATAACAACAG-3'. Single-color chemiluminescence *in situ*  
421 hybridization (ISH) was performed as previously described<sup>40</sup>. The embryonic brains  
422 were drop-fixed in 4% PFA in 100 mM sodium phosphate buffer (PB) pH 7.4 at 4°C  
423 more than 24 hours, then replaced into 30% sucrose in 4% PFA in PB. Sections at 40  
424 µm thickness by microtome (Leica, Wetzlar, Germany) were mounted on glass slides  
425 and fixed in 4% PFA in PBS for 15 min at room temperature (RT), and treated with  
426 proteinase K (Roche, Basel, Switzerland) for 30 min at 37°C. Sections were then fixed  
427 again and hybridized with digoxigenin (DIG)-labeled probes (Roche, Basel,  
428 Switzerland) at 72°C overnight in hybridization solution (50% formamide, 5xSSC, 1%  
429 SDS, 500µg/ml yeast tRNA, 200 µg/ml acetylated BSA, and 50 µg/ml heparin). After  
430 washing out excess probe, sections were blocked with 10% lamb serum in TBST for 1  
431 hour at RT and incubated with alkaline phosphatase conjugated to DIG antibody (Roche,  
432 Basel, Switzerland) in TBST. Color was developed with a combination of 3.5 mg/ml  
433 chromagens nitroblue tetrazolium (Nacalai, Kyoto, Japan) and 1.75 mg/ml  
434 5-bromo-4-chloro-3-indolylphosphate (Nacalai, Kyoto, Japan) in NTMT (100 mM  
435 NaCl, 100 mM Tris-HCl (pH 9.5), 50 mM MgCl<sub>2</sub>, 1% Tween 20). Images were taken  
436 with an Olympus VS-100 virtual slide system with a 10x objective lens or with a  
437 KEYENCE digital microscope, BZ-X700, with a 4x objective lens.

438

#### 439 **Transfection and immunocytochemistry**

440 To clone the cDNA of marmoset *GPR56*, marmoset cDNA library was generated. Total  
441 RNA was prepared from marmoset brain and was reverse-transcribed by the  
442 SuperScript III First-Strand Synthesis System (Thermo Fisher Scientific). Marmoset  
443 *GPR56* cDNA was amplified by PCR using the primer set marGPR56 5' end (f)-  
444 ATGACTGCCAGTGCCTCCT and marGPR56 3' end (r)-

445 GATGCGGCTGGACGAGGTGCT and then re-amplified using the primers marGPR56  
446 *Hind*III kozak (f)- CCCAAGCTTGCCACCATGACTGCCAGTGCCTCCT and  
447 marGPR56 *Spe*I 1xHA (r)-  
448 GGACTAGTTTAAGCGTAATCTGGAACATCGTATGGGTAGATGCGGCTGGAC  
449 GAGGTGCT and subcloned into the pCAG-neo. 0.2  $\mu$ g of the resulting hemagglutinin  
450 (HA)-tagged marmoset GPR56 expression vector (pCAG-neo-1xHA-GPR56) was  
451 transfected into COS-7 cells cultured in a well of 8 well chamber slide glass using  
452 GeneJuice Transfection Reagent (Merck Millipore) according to the manufacturer's  
453 instructions, and the cells were cultured at 37°C in 5% CO<sub>2</sub> incubator for 27 hrs.  
454 Immunostaining was performed as previously described<sup>41</sup>. Briefly, cultured cells were  
455 fixed with 4% PFA-PBS for 20 min at 4°C. The fixed cells were permeabilized with  
456 0.3% Triton X-100-PBS for 15 min at room temperature (RT), incubated with TNB  
457 blocking buffer (PerkinElmer) for 1 hr at RT and subsequently incubated with primary  
458 antibodies: pan-GPR56 (clone H11) (Millipore MABN310, 1:150) and HA-Tag (3F10)  
459 (Merck AB\_2314622, 1:1000) overnight at 4°C, followed by incubation with  
460 fluorescent-dye-conjugated secondary antibodies: goat secondary antibodies coupled to  
461 Alexa 488 (Molecular Probes, 1:200) or Alexa 555 (1:400) for 1.5 hr at RT. Nuclei  
462 were counterstained with Hoechst 33258 (10 mg/ml, Sigma-Aldrich). Images were  
463 acquired by Carl Zeiss LSM700 confocal microscope using Plan-Apochromat 20x/0.8  
464 M27 objective (Zeiss, 420650-9901), C-Apochromat 63x/1.2W Korr UV-VIS-IR M27  
465 objective (Zeiss, 421787-9970).

466

#### 467 **Immunohistochemistry and image acquisition**

468 After dissection, the whole brains were immediately put into 4% PFA in 120mM PB for  
469 24 hours at 4°C, and then were replaced into 30% sucrose in PB at 4°C. After slicing  
470 them 50  $\mu$ m thick with a microtome, immunofluorescence was performed as follows.  
471 Antigen retrieval was performed in 0.01 M sodium citrate buffer (pH 6.0) supplemented  
472 with 10% (vol/vol) glycerol for 30 min at 85°C, and the samples were left for 30 min  
473 back to RT Sections were then washed in PBS, permeabilized in 0.3% Triton-X 100  
474 (wt/vol) in PBS for 30 min at RT, and blocked by TN Blocking buffer (TSA Plus  
475 Fluorescence System; PerkinElmer, MA, USA). Primary antibodies were incubated for  
476 more than 18 hr at 4°C, and the secondary antibodies were incubated overnight at 4°C.



477 The following primary antibodies were used: rat monoclonal antibodies to CTIP2  
478 (Abcam ab18465 (25B6), 1:200), somatostatin (Millipore MAB354, 1:50); rabbit  
479 polyclonal antibodies to GABA (SIGMA A2052, 1:200), calretinin (Abcam ab16694,  
480 1:100), somatostatin (Abcam ab108456, 1:100), NMDAR1 (Abcam ab17345, 1:100);  
481 rabbit monoclonal antibody to TTF1/Nkx2.1 (Abcam ab76013 (clone EP1584Y),  
482 1:100); mouse monoclonal antibodies to pan-GPR56 (Millipore MABN310 (clone H11,  
483 IgG<sub>1</sub>), 1:150); goat polyclonal antibodies to GFP (Rockland 600-101-215, 1:300),  
484 Parvalbumin (Swant, 1:600); chick polyclonal antibody to GFP (Aves GFP-1020,  
485 1:300). Donkey or goat secondary antibodies coupled to Alexa 488, Alexa 555 or Alexa  
486 647 were used (Molecular Probes, 1:400). For antibodies against GFP56 and  
487 Parvalbumin, TSA Plus Fluorescence System (PerkinElmer, MA, USA) was used to  
488 enhance the signal. All sections were counterstained with Hoechst33258 (Sigma,  
489 1:1000). Sections were mounted in PermaFluor (Thermo Fisher Scientific) and kept at  
490 4°C. The images were acquired by Carl Zeiss LSM700 confocal microscope using a  
491 Plan-Apochromat 10X/0.45 M27 objective (Zeiss, 420640-9900), C-Apochromat  
492 63x/1.2W Korr UV-VIS-IR M27 objective (Zeiss, 421787-9970), and  $\alpha$   
493 Plan-Apochromat 100x/1.46 Oil DIC M27 objective (Zeiss, 440782-9800). We used  
494 ZEN 2009 software (version: 6.0.0.303, Carl Zeiss, Oberkochen, Germany) to acquire  
495 z-stack images with a z-interval of either 1–6  $\mu$ m (10x) or 0.5–1.05  $\mu$ m (63x, 100x).  
496 Section images were taken by an automatic tiling scan system. The images were  
497 processed by image J (version: 2.0.0-rc-69/1.52p, U.S. National Institute of Health) and  
498 Photoshop CS6 (13.0.6x64, Adobe Inc., CA, USA).

499

#### 500 **Determination of layers in the cerebral cortex and cell counting**

501 Each zone in cerebral cortex was defined by the density and direction of nuclei stained  
502 with Hoechst 33258 as previously reported<sup>26</sup>. Moreover, in the cortical plate, each layer  
503 was defined by the stained patterns of Hoechst 33258 and pan-GPR56 (clone H11).  
504 Layer I was identified as a cell-sparse layer. Layer II was identified by radically aligned  
505 nuclear packing. The nuclei in layer III also exhibited radial morphology but sparsely  
506 rather than in layer II. Layer IV was defined as a densely packed cell layer. Layer V was  
507 defined as a relatively cell-sparse layer between the layer IV and VI, and by the  
508 expression pattern of CTIP2, which is known to express at high levels in neocortical

509 neurons of layer V<sup>27</sup>. VI was identified as a cell-dense layer located beneath the V. For  
510 the identification and quantification of the labeled cells, cell counts were done manually.  
511 We first checked 10–13 z-sections within a z-stack of each single channel image and  
512 manually marked positive cells on the z-projected image. Then, two z-projected images  
513 were merged, and the numbers of overlapping marks were counted as double positive  
514 cells. Cell counting was confined to the dorsolateral telencephalon.

## References

- 1 Liu, M. *et al.* GPR56, a novel secretin-like human G-protein-coupled receptor gene. *Genomics* **55**, 296-305, doi:10.1006/geno.1998.5644 (1999).
- 2 Piao, X. *et al.* G protein-coupled receptor-dependent development of human frontal cortex. *Science* **303**, 2033-2036, doi:10.1126/science.1092780 (2004).
- 3 Iguchi, T. *et al.* Orphan G protein-coupled receptor GPR56 regulates neural progenitor cell migration via a G alpha 12/13 and Rho pathway. *The Journal of biological chemistry* **283**, 14469-14478, doi:10.1074/jbc.M708919200 (2008).
- 4 Bai, Y., Du, L., Shen, L., Zhang, Y. & Zhang, L. GPR56 is highly expressed in neural stem cells but downregulated during differentiation. *Neuroreport* **20**, 918-922, doi:10.1097/WNR.0b013e32832c92d7 (2009).
- 5 Jeong, S. J., Luo, R., Li, S., Strokes, N. & Piao, X. Characterization of G protein-coupled receptor 56 protein expression in the mouse developing neocortex. *J Comp Neurol* **520**, 2930-2940, doi:10.1002/cne.23076 (2012).
- 6 Guo, J. & Anton, E. S. Decision making during interneuron migration in the developing cerebral cortex. *Trends in cell biology* **24**, 342-351, doi:10.1016/j.tcb.2013.12.001 (2014).
- 7 Bae, B. I. *et al.* Evolutionarily dynamic alternative splicing of GPR56 regulates regional cerebral cortical patterning. *Science* **343**, 764-768, doi:10.1126/science.1244392 (2014).
- 8 Li, S. *et al.* GPR56 regulates pial basement membrane integrity and cortical lamination. *J Neurosci* **28**, 5817-5826, doi:10.1523/jneurosci.0853-08.2008 (2008).
- 9 Luo, R. *et al.* G protein-coupled receptor 56 and collagen III, a receptor-ligand pair, regulates cortical development and lamination. *Proc Natl Acad Sci U S A* **108**, 12925-12930, doi:10.1073/pnas.1104821108 (2011).
- 10 Giera, S. *et al.* The adhesion G protein-coupled receptor GPR56 is a

- cell-autonomous regulator of oligodendrocyte development. *Nature communications* **6**, 6121, doi:10.1038/ncomms7121 (2015).
- 11 Ackerman, S. D., Garcia, C., Piao, X., Gutmann, D. H. & Monk, K. R. The adhesion GPCR Gpr56 regulates oligodendrocyte development via interactions with Galpha12/13 and RhoA. *Nature communications* **6**, 6122, doi:10.1038/ncomms7122 (2015).
- 12 Bellusci, M. *et al.* Vigabatrin efficacy in GPR56-associated polymicrogyria: The role of GABAA receptor pathway. *Epilepsia* **57**, 1337-1338, doi:10.1111/epi.13453 (2016).
- 13 Izpisua Belmonte, J. C. *et al.* Brains, genes, and primates. *Neuron* **86**, 617-631, doi:10.1016/j.neuron.2015.03.021 (2015).
- 14 Okano, H. *et al.* Brain/MINDS: A Japanese National Brain Project for Marmoset Neuroscience. *Neuron* **92**, 582-590, doi:10.1016/j.neuron.2016.10.018 (2016).
- 15 Okano, H. & Kishi, N. Investigation of brain science and neurological/psychiatric disorders using genetically modified non-human primates. *Current opinion in neurobiology* **50**, 1-6, doi:10.1016/j.conb.2017.10.016 (2018).
- 16 Miller, C. T. *et al.* Marmosets: A Neuroscientific Model of Human Social Behavior. *Neuron* **90**, 219-233, doi:10.1016/j.neuron.2016.03.018 (2016).
- 17 Tokuno, H., Tanaka, I., Umitsu, Y., Akazawa, T. & Nakamura, Y. Web-accessible digital brain atlas of the common marmoset (*Callithrix jacchus*). *Neurosci Res* **64**, 128-131, doi:10.1016/j.neures.2009.02.003 (2009).
- 18 Tokuno, H., Tanaka, I., Umitsu, Y. & Nakamura, Y. Stereo Navi 2.0: software for stereotaxic surgery of the common marmoset (*Callithrix jacchus*). *Neurosci Res* **65**, 312-315, doi:10.1016/j.neures.2009.08.004 (2009).
- 19 Hikishima, K. *et al.* Atlas of the developing brain of the marmoset monkey constructed using magnetic resonance histology. *Neuroscience* **230**, 102-113, doi:10.1016/j.neuroscience.2012.09.053 (2013).

- 20 Sawada, K. *et al.* Fetal sulcation and gyrification in common marmosets (*Callithrix jacchus*) obtained by ex vivo magnetic resonance imaging. *Neuroscience* **257**, 158-174, doi:10.1016/j.neuroscience.2013.10.067 (2014).
- 21 Sasaki, E. *et al.* Generation of transgenic non-human primates with germline transmission. *Nature* **459**, 523-527, doi:10.1038/nature08090 (2009).
- 22 Park, J. E. *et al.* Generation of transgenic marmosets expressing genetically encoded calcium indicators. *Sci Rep* **6**, 34931, doi:10.1038/srep34931 (2016).
- 23 Huang, L., Merson, T. D. & Bourne, J. A. In vivo whole brain, cellular and molecular imaging in nonhuman primate models of neuropathology. *Neuroscience and biobehavioral reviews* **66**, 104-118, doi:10.1016/j.neubiorev.2016.04.009 (2016).
- 24 Hansen, D. V., Lui, J. H., Parker, P. R. & Kriegstein, A. R. Neurogenic radial glia in the outer subventricular zone of human neocortex. *Nature* **464**, 554-561, doi:10.1038/nature08845 (2010).
- 25 Fietz, S. A. *et al.* OSVZ progenitors of human and ferret neocortex are epithelial-like and expand by integrin signaling. *Nat Neurosci* **13**, 690-699, doi:10.1038/nn.2553 (2010).
- 26 Kelava, I. *et al.* Abundant occurrence of basal radial glia in the subventricular zone of embryonic neocortex of a lissencephalic primate, the common marmoset *Callithrix jacchus*. *Cerebral cortex* **22**, 469-481, doi:10.1093/cercor/bhr301 (2012).
- 27 Molyneaux, B. J., Arlotta, P., Menezes, J. R. & Macklis, J. D. Neuronal subtype specification in the cerebral cortex. *Nature reviews. Neuroscience* **8**, 427-437, doi:10.1038/nrn2151 (2007).
- 28 Nobrega-Pereira, S. *et al.* Postmitotic Nkx2-1 controls the migration of telencephalic interneurons by direct repression of guidance receptors. *Neuron* **59**, 733-745, doi:10.1016/j.neuron.2008.07.024 (2008).
- 29 Liebscher, I. *et al.* New functions and signaling mechanisms for the class of adhesion G protein-coupled receptors. *Annals of the New York Academy of Sciences* **1333**, 43-64, doi:10.1111/nyas.12580 (2014).

- 30 Cobos, I. *et al.* Mice lacking *Dlx1* show subtype-specific loss of interneurons, reduced inhibition and epilepsy. *Nat Neurosci* **8**, 1059-1068, doi:10.1038/nn1499 (2005).
- 31 Marsh, E. D. & Golden, J. A. Developing Models of Aristaless-related homeobox mutations in *Jasper's Basic Mechanisms of the Epilepsies [Internet]. 4th edition* (eds. Michael, A. Rogawski., Antonio, V. Delgado-Escueta., Jeffrey, L. Noebels., Massimo, Avoli. and Richard, W. Olsen.) <https://www.ncbi.nlm.nih.gov/books/NBK98176/> (National Center for Biotechnology Information, 2012).
- 32 Lim, L., Mi, D., Llorca, A. & Marin, O. Development and Functional Diversification of Cortical Interneurons. *Neuron* **100**, 294-313, doi:10.1016/j.neuron.2018.10.009 (2018).
- 33 Nakayama, T. *et al.* Deletions of *SCN1A* 5' genomic region with promoter activity in Dravet syndrome. *Human mutation* **31**, 820-829, doi:10.1002/humu.21275 (2010).
- 34 Higurashi, N. *et al.* A human Dravet syndrome model from patient induced pluripotent stem cells. *Mol Brain* **6**, 19, doi:10.1186/1756-6606-6-19 (2013).
- 35 Gao, Q. W. *et al.* A Point Mutation in *SCN1A* 5' Genomic Region Decreases the Promoter Activity and Is Associated with Mild Epilepsy and Seizure Aggravation Induced by Antiepileptic Drug. *Molecular neurobiology* **54**, 2428-2434, doi:10.1007/s12035-016-9800-y (2017).
- 36 Holmes, G. L. & Noebels, J. L. The Epilepsy Spectrum: Targeting Future Research Challenges. *Cold Spring Harbor perspectives in medicine* **6**, doi:10.1101/cshperspect.a028043 (2016).
- 37 Naka, H., Nakamura, S., Shimazaki, T. & Okano, H. Requirement for COUP-TFI and II in the temporal specification of neural stem cells in CNS development. *Nat Neurosci* **11**, 1014-1023, doi:10.1038/nn.2168 (2008).
- 38 Takahashi, T. *et al.* Birth of healthy offspring following ICSI in in vitro-matured common marmoset (*Callithrix jacchus*) oocytes. *PLoS One* **9**, e95560, doi:10.1371/journal.pone.0095560 (2014).
- 39 Sato, K. *et al.* Generation of a Nonhuman Primate Model of Severe

- Combined Immunodeficiency Using Highly Efficient Genome Editing. *Cell stem cell* **19**, 127-138, doi:10.1016/j.stem.2016.06.003 (2016).
- 40 Mashiko, H. *et al.* Comparative anatomy of marmoset and mouse cortex from genomic expression. *J Neurosci* **32**, 5039-5053, doi:10.1523/JNEUROSCI.4788-11.2012 (2012).
- 41 Kuwako, K. I. & Okano, H. The LKB1-SIK Pathway Controls Dendrite Self-Avoidance in Purkinje Cells. *Cell reports* **24**, 2808-2818.e2804, doi:10.1016/j.celrep.2018.08.029 (2018).

515 **Acknowledgements**

516 We thank Hiroyuki Kanki and Fumiko Ozawa for their contributions to the preparation  
517 of probes for *in situ* hybridization. We appreciate Dr. Takuya Shimazaki and Prof. Miho  
518 Ohsugi for their advice in the preparation of the manuscript. We also appreciate Prof.  
519 Douglass Sipp and Ms. Jaimi Nakajima for proofreading this manuscript. This work  
520 was supported by Funding Program for World-leading Innovative R&D on Science and  
521 Technology (FIRST) from the Ministry of Education, Culture, Sports, Science and  
522 Technology (MEXT), and Brain Mapping by Integrated Neurotechnologies for Disease  
523 Studies (Brain/MINDS) from Japan Agency for Medical Research and  
524 Development (AMED) (JP19dm0207001, 18dm0207065h0001, 18dm0207002h0005)  
525 to T.S., E.S., and H.O. This work was also supported by a grant from Brain science  
526 research projects of Center for Novel Science Initiatives of National Institutes of  
527 Natural Sciences (NINS) to A.Y.M.

528

529 **Author Contributions**

530 A.Y.M. designed the research, conducted the experiments, and wrote the manuscript.  
531 K.K., J.O., M.O., and H.M. contributed to the experiments. K.K. and B.I.B. edited the  
532 manuscript. T.S. and E.S. conducted experiments. C.A.W., E.S. and H.O. supervised  
533 and edited the manuscript.

534

535 **Competing interests**

536 The authors declare no competing financial interests.



537 **Figure legends**

538 **Figure 1.**

539 **Generation of 0.3k hGPR56 e1m-EGFP transgenic marmosets.**

540 (A) Schematic diagram of the lentiviral vector. CMV; Cytomegalovirus promoter,  $\psi$ ;  
541 packaging signal, RRE; rev responsive element, cPPT; central polypurine tract,  
542 WPRE : Woodchuck hepatitis virus Posttranscriptional Regulatory Element, *hGPR56*;  
543 0.3-kbp human *GPR56 e1m* cis-element (minimal promoter). (B) The transgenic  
544 founder infants; I651TgF (female) and I757TgM (male). (C) Detection of genomic  
545 integration of transgene by genomic PCR. EGFP encoding sequence was amplified  
546 using template genomic DNA purified from hair cells of or placentas delivered with  
547 infants. Beta-actin amplifications were used as control. (D) Detection of transgene  
548 expression by RT-PCR. EGFP encoding sequence was amplified from cDNA templates  
549 prepared from RNAs purified from hair cells or placentas delivered with them with  
550 (RT+) or without (RT-) reverse transcriptase. Beta-actin amplifications were used as  
551 control.

552

553 **Figure 2.**

554 **Expression of GPR56 mRNA in the brain of wild type marmoset embryo.**

555 (A) Coronal sections of transgenic marmoset brain at the fourteenth embryonic week  
556 (EW) were hybridized with anti-sense (a-e) or sense probe (c) for *GPR56* mRNA.  
557 Cerebral cortex (Cx), caudate nucleus (Cd), ventricular zone of the caudate (vCd),  
558 subventricular zone of the caudate (svCd), thalamus (Th), hippocampus (HIP), pons,  
559 midbrain (MB), ventricular zone (VZ), inter subventricular zone (iSVZ), outer  
560 subventricular zone (oSVZ), and intermediate zone (IZ) are indicated. Scale bars =1  
561 mm. (B) Enlarged image of the area marked by a square in panel b in (A). (C) Enlarged  
562 image of the area marked by a square in panel d in (A). Scale bar in B and C = 200  $\mu$ m.

563

564 **Figure 3.**

565 **Expression of hGPR56 e1m-driven EGFP in transgenic marmoset embryo.**

566 (A) EGFP signals in the Dorsal view (a-c), ventral view (d-f), lateral view (g-i), and  
567 median view (j-l) of the whole brain of wild type (left panels) and transgenic marmoset  
568 (middle and right panels) at E95. Thalamus (Th), hypothalamus (Hy), midbrain (MB),  
569 cerebellum (Cb), medulla oblongata (MO), cerebral cortex (Cx), and olfactory bulb

570 (OB) are shown. **(B)** Immunofluorescent staining of coronal sections from the anterior  
571 (a) to posterior (d) of the transgenic marmoset brain (E95) for EGFP. Lines on the  
572 schema indicate the position of each section. Cingulate gyrus (CG), early caudate (Cd),  
573 early putamen (Pu), hippocampus (HIP). Scale bars in A and B = 1 mm. **(C)** Coronal  
574 section of cerebral cortex of the transgenic marmoset brain (E95) stained for DNA  
575 (Hoechst) and EGFP. Cortical plate (CP), subplate (SP), IZ, oSVZ, iSVZ, and VZ are  
576 indicated. Scale bar = 200  $\mu\text{m}$ . **(D)** Enlarged image of the area marked by a square in  
577 the panel of (B), with indication for Cd, ventricular zone of Cd (vCd), and  
578 subventricular zone of Cd (svCd).

579

580 **Figure 4.**

581 ***hGPR56 e1m*-EGFP expression in the cerebral cortex.**

582 **(A)** Immunofluorescent staining of coronal sections from the anterior (a) to posterior (e)  
583 of the transgenic marmoset brain at E113 for EGFP (green) and pan-GPR56 (magenta).  
584 Lines on the schema indicate the position of each section. Scale bar = 1mm. **(B)**  
585 Coronal section of cerebral cortex of the transgenic marmoset brain at E113 stained for  
586 Hoechst (Blue), *hGPR56 e1m*-EGFP (green), and pan-GPR56 (magenta), CTIP2 or  
587 GABA (cyan). The section stained for CTIP2 is the one 50  $\mu\text{m}$  anterior to the other  
588 sections. Cortical plate (CP) consisting of layers I to VI, SP, IZ, oSVZ, iSVZ, and VZ  
589 are indicated. Scale bar = 200 $\mu\text{m}$ . **(C)** Distribution of GPR56 (magenta), *hGPR56 e1m*-  
590 EGFP (green), and CTIP2 or GABAs (cyan) positive cells in layer V of the cortical  
591 plate. Representative *hGPR56 e1m*-EGFP positive cells with (filled arrowheads) or  
592 without (open arrowheads) expression of CTIP2 or GABAs are marked. The panels  
593 furthest to the right display orthogonal views of a *hGPR56 e1m*-EGFP positive cell  
594 marked by the arrow. Orthogonal views of other *hGPR56 e1m*-EGFP positive cells are  
595 shown in Figure S5A. We used ZEN 2009 software (version: 6.0.0.303, Carl Zeiss,  
596 Oberkochen, Germany) to construct orthogonal views. Scale bar = 50  $\mu\text{m}$ . **(D)** Ratio of  
597 *hGPR56 e1m*-EGFP positive cells in each CP layer of transgenic marmoset no.1 and  
598 no.2. **(E)** Ratio of CTIP2<sup>+</sup> or GABA<sup>+</sup> cells among the *hGPR56 e1m*-driven EGFP<sup>+</sup> cells  
599 in layer V of transgenic marmosets no.1 and no.2. **(F)** Ratio of CTIP2<sup>+</sup> or GABA<sup>+</sup> cells  
600 among the pan-GPR56<sup>+</sup> cells in layer V of transgenic marmosets no.1 and no.2.

601

602

603 **Figure 5.**

604 **Subtype marker expression in the *hGPR56e1m*-EGFP positive GABAergic**  
605 **interneurons.**

606 **(A)** Distribution of *hGPR56e1m*-EGFP and PV, SST or Calretinin in the cortical plate  
607 of the transgenic marmoset brain (E113). Scale bar = 1 mm. Enlarged images of the  
608 area marked by rectangles in top panels are shown in the lower panels. The dashed  
609 ellipses indicate the positive cells of each subtype marker of GABAergic neuron. Scale  
610 bars = 50  $\mu$ m. **(B)** Ratio of PV<sup>+</sup>, CR<sup>+</sup>, or STT<sup>+</sup> cells among the *hGpr e1m*-driven EGFP<sup>+</sup>  
611 cells in the layer V of transgenic marmoset no.1 and no.2. **(C)** Ratio of PV<sup>+</sup>, CR<sup>+</sup>, or  
612 STT<sup>+</sup> cells among the cells in the layer V of transgenic marmoset no.1 and no.2.

**Table 1. Summary of production of founder (F0) transgenic marmosets.**

|                                                  |    |         |
|--------------------------------------------------|----|---------|
| No. of oocytes subjected to lentiviral injection |    | 41      |
| No. of embryos developed to (No. of ET embryos)  | 2C | 40 (0)  |
|                                                  | 4C | 38 (6)  |
|                                                  | 8C | 27 (20) |
|                                                  | M  | 1 (1)   |
|                                                  | BI | 0 (0)   |
| Total No. of ET embryos by day7                  |    | 27      |
| No. of surrogates                                |    | 11      |
| No. of pregnancies (%)                           |    | 5 (19)  |
| No. of deliveries (%)                            |    | 2 (7)   |

ET; embryo transplantation, 2C; 2-cell stage embryo, 4C; 4-cell stage embryo, M; morula, BI; Blastocyst. All healthy embryos developed beyond the 4-cell stage were transplanted to surrogate mothers.

**Table 2. Summary of embryo production from F1 transgenic marmosets.**

| Parents                                      | I651TgF x WT | WT x I757TgM |
|----------------------------------------------|--------------|--------------|
| No. of procedures                            | 15           | 13           |
| No. of collected embryos                     | 19           | 0            |
| No. of transplanted embryos                  | 16           | 0            |
| No. of surrogates                            | 8            | 0            |
| No. of fetuses obtained by caesarean section | 6            | 0            |

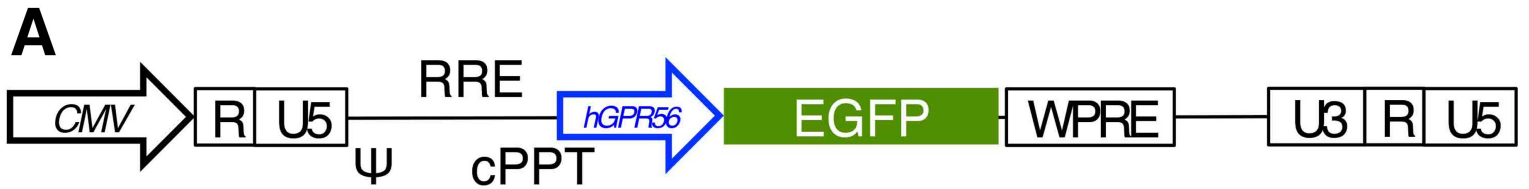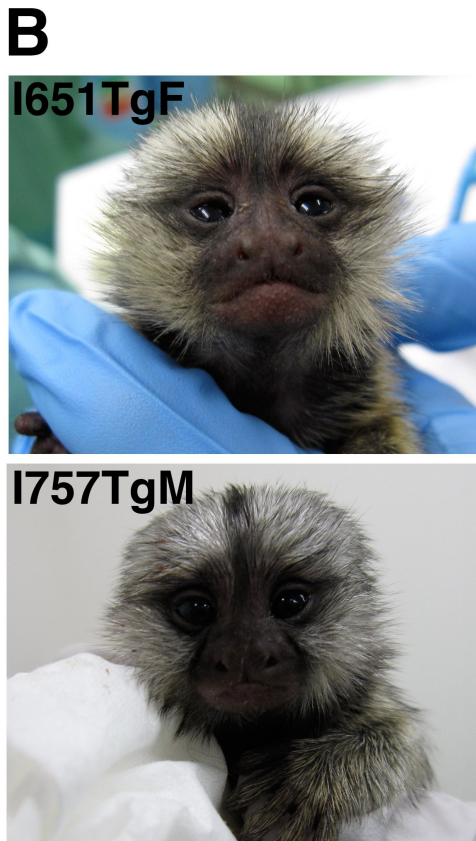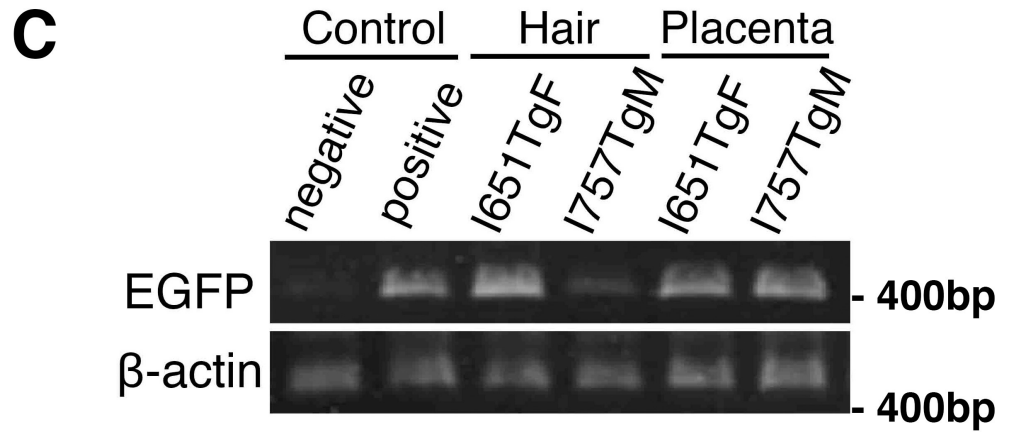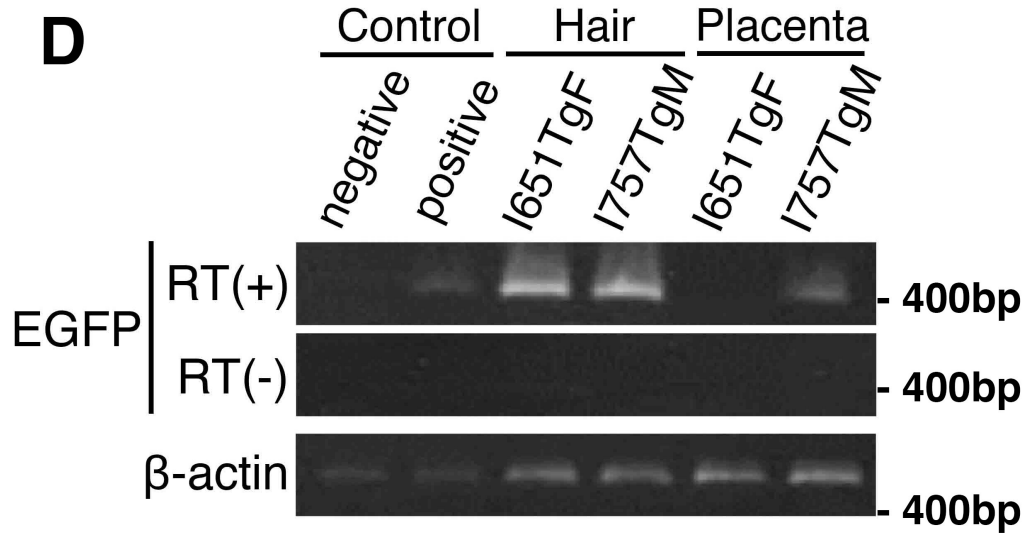

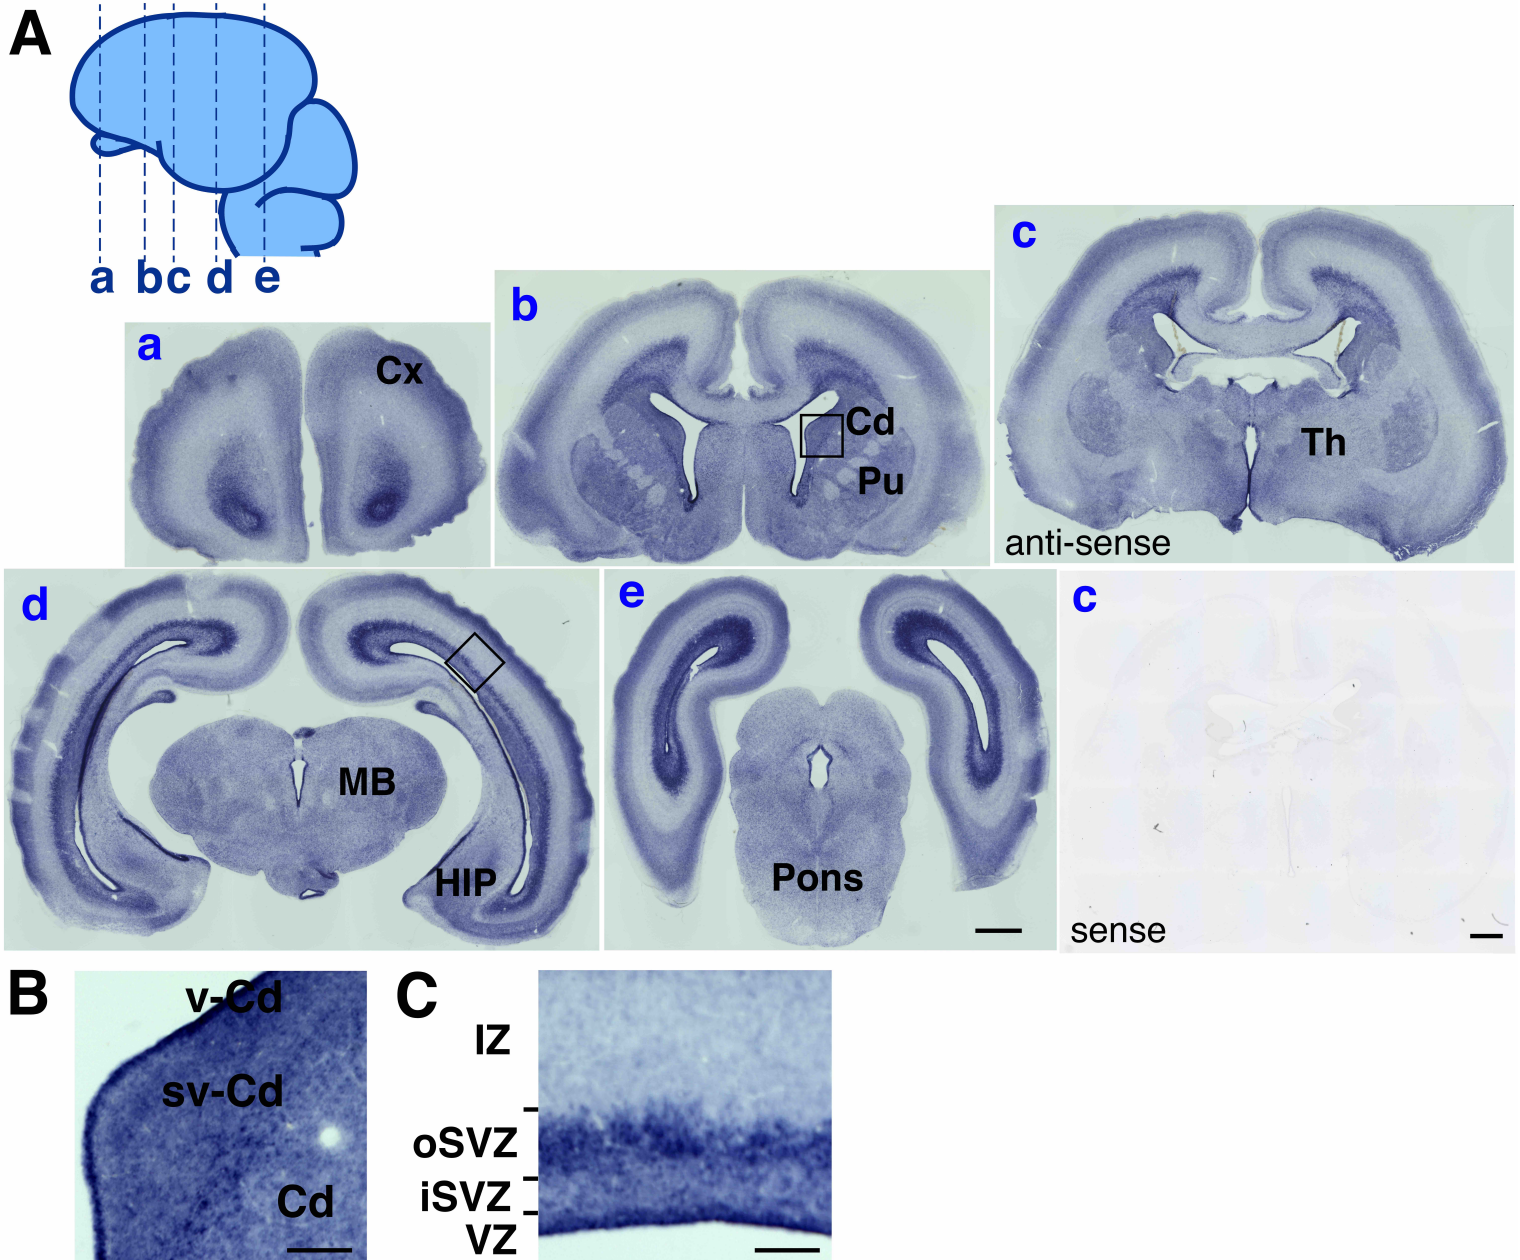

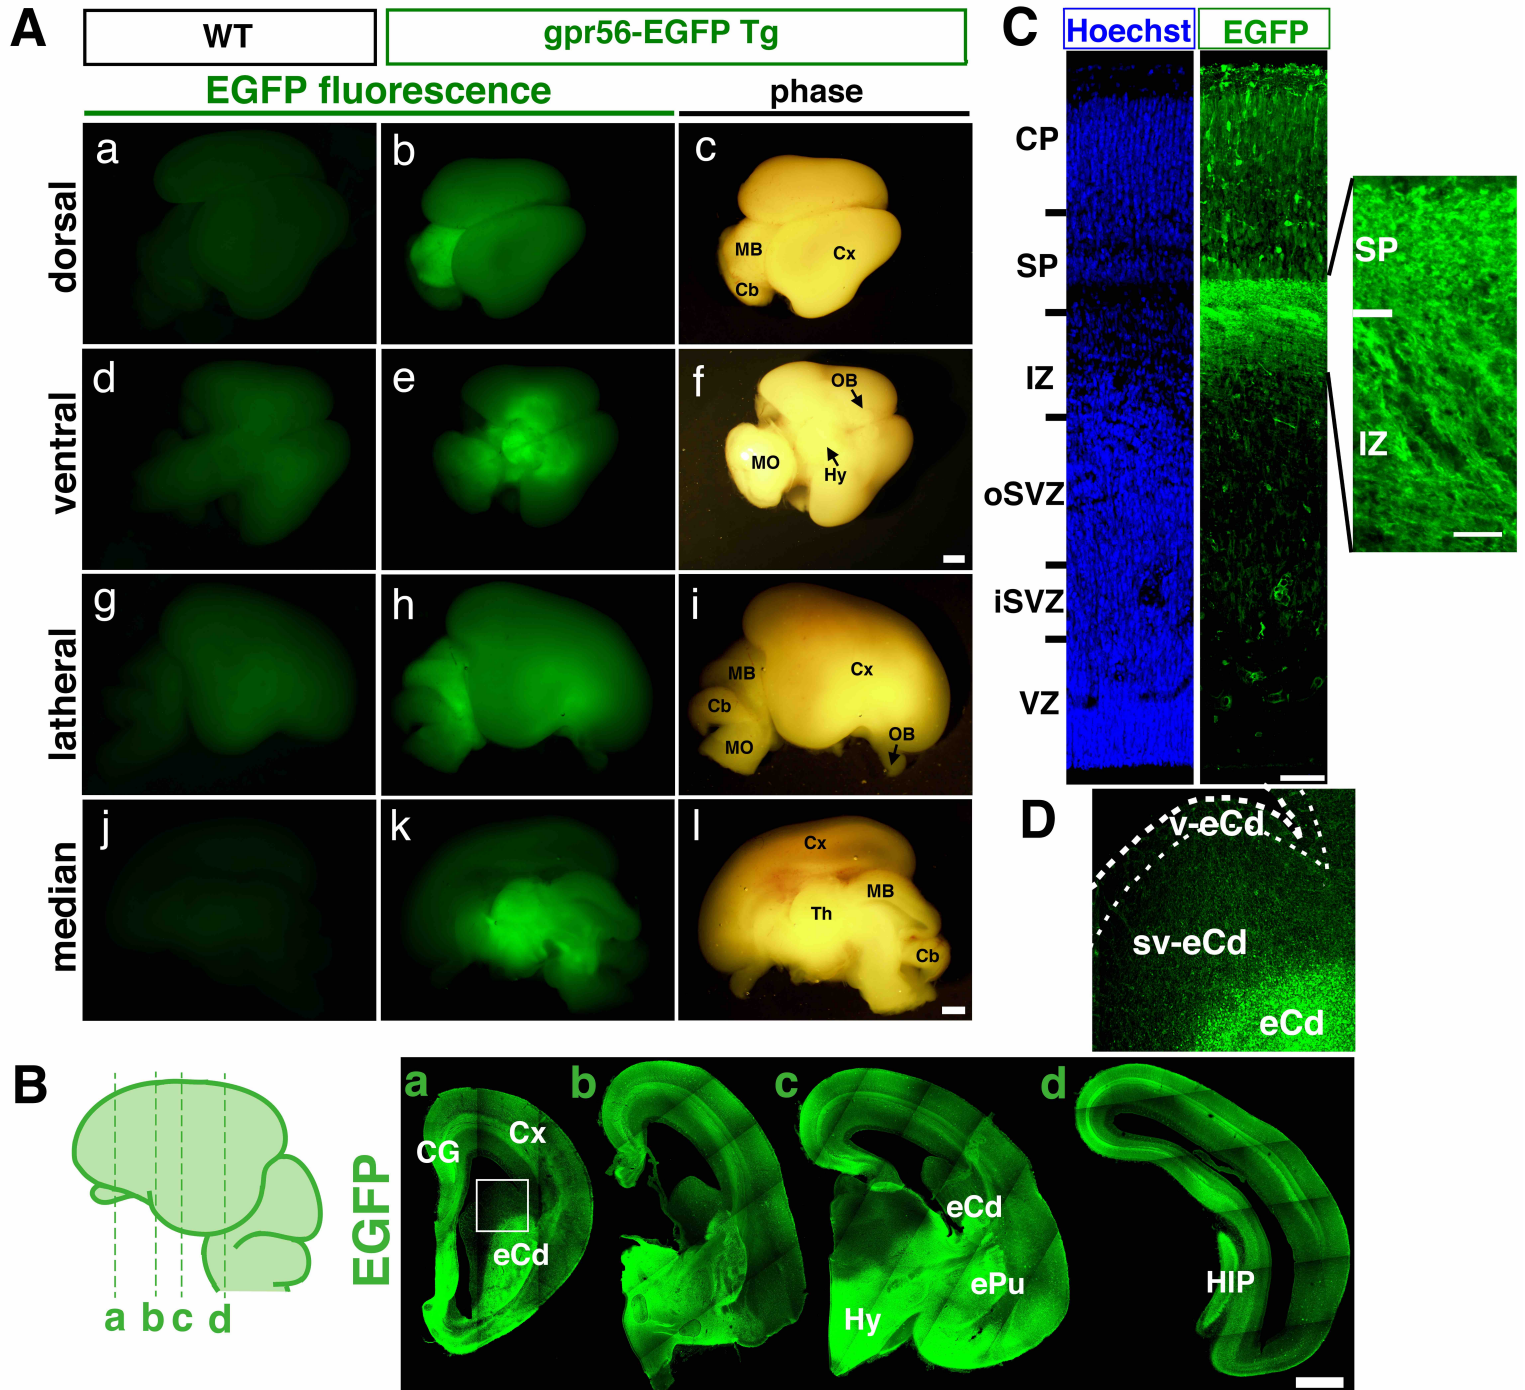

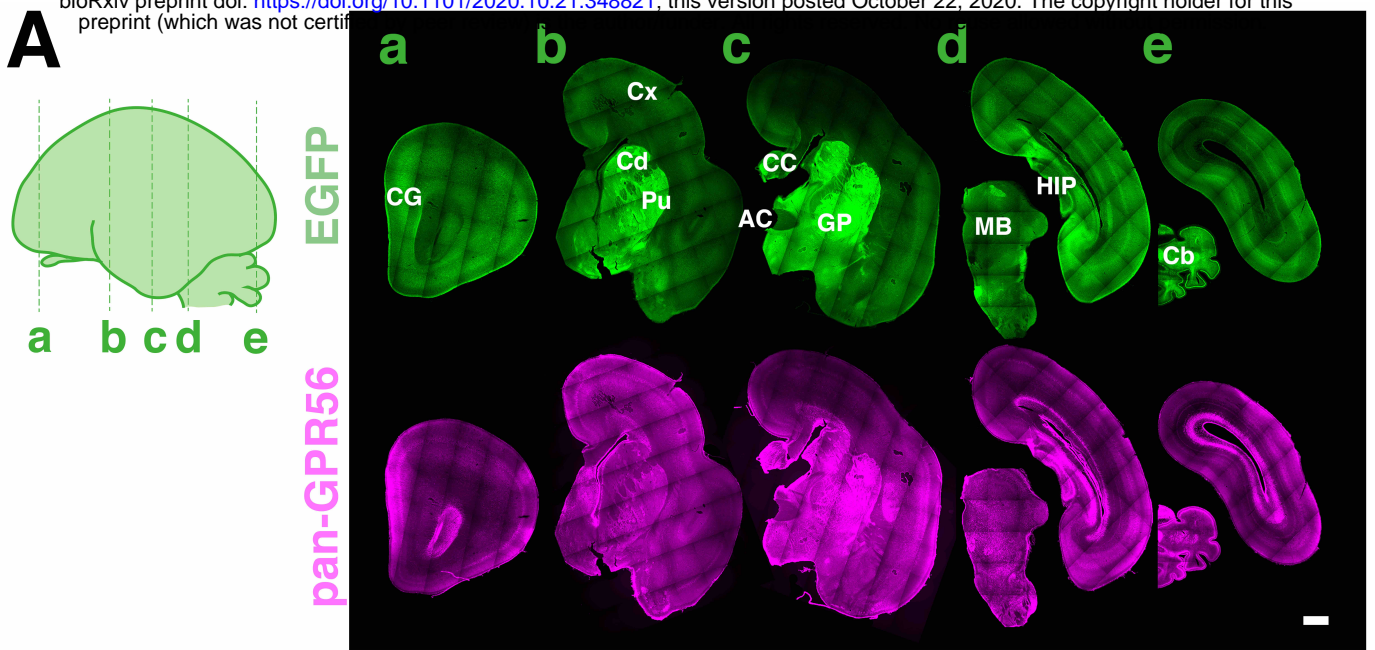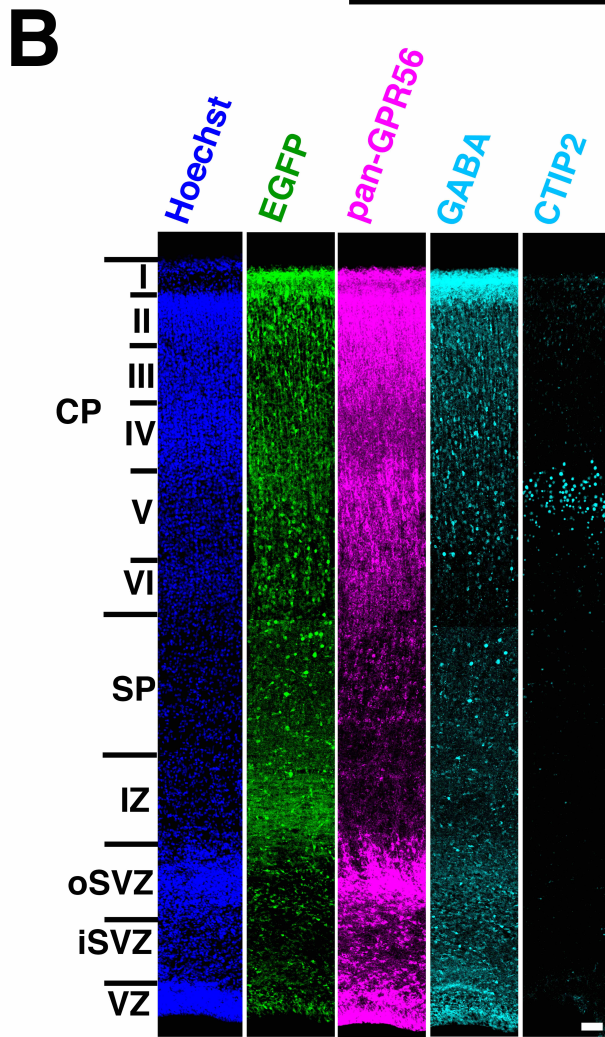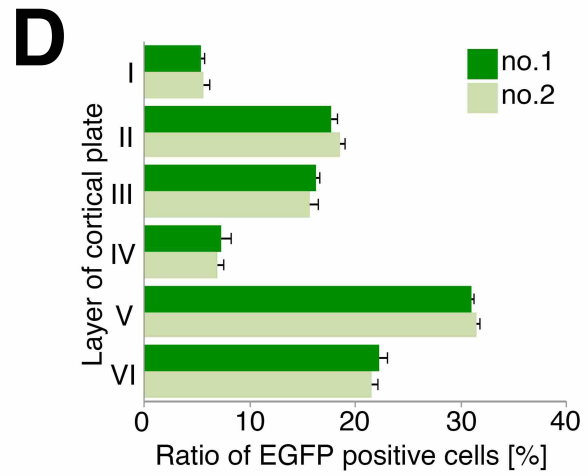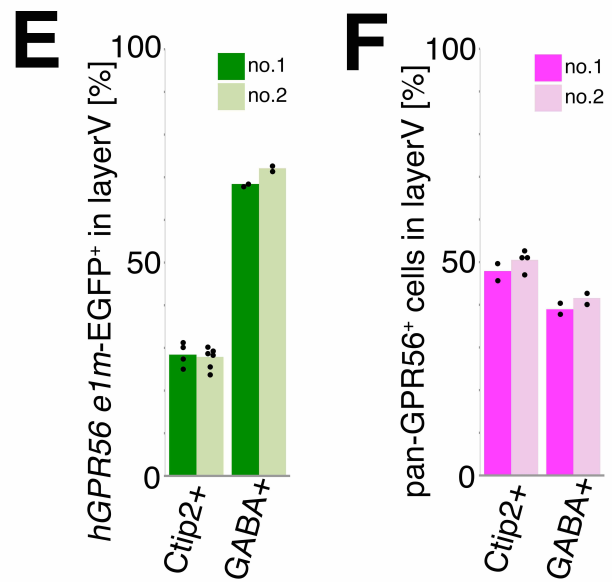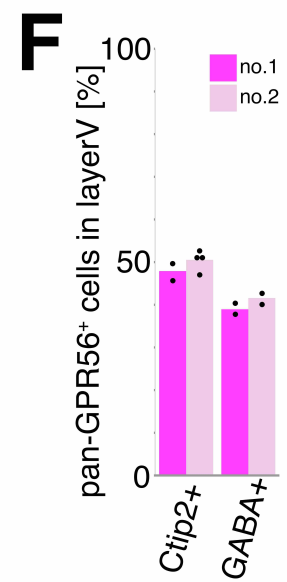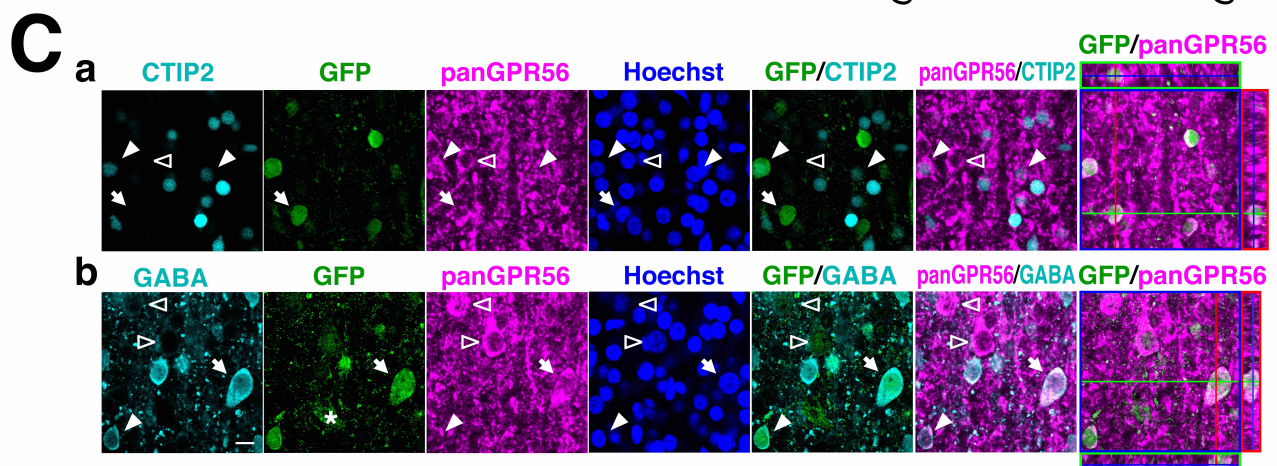



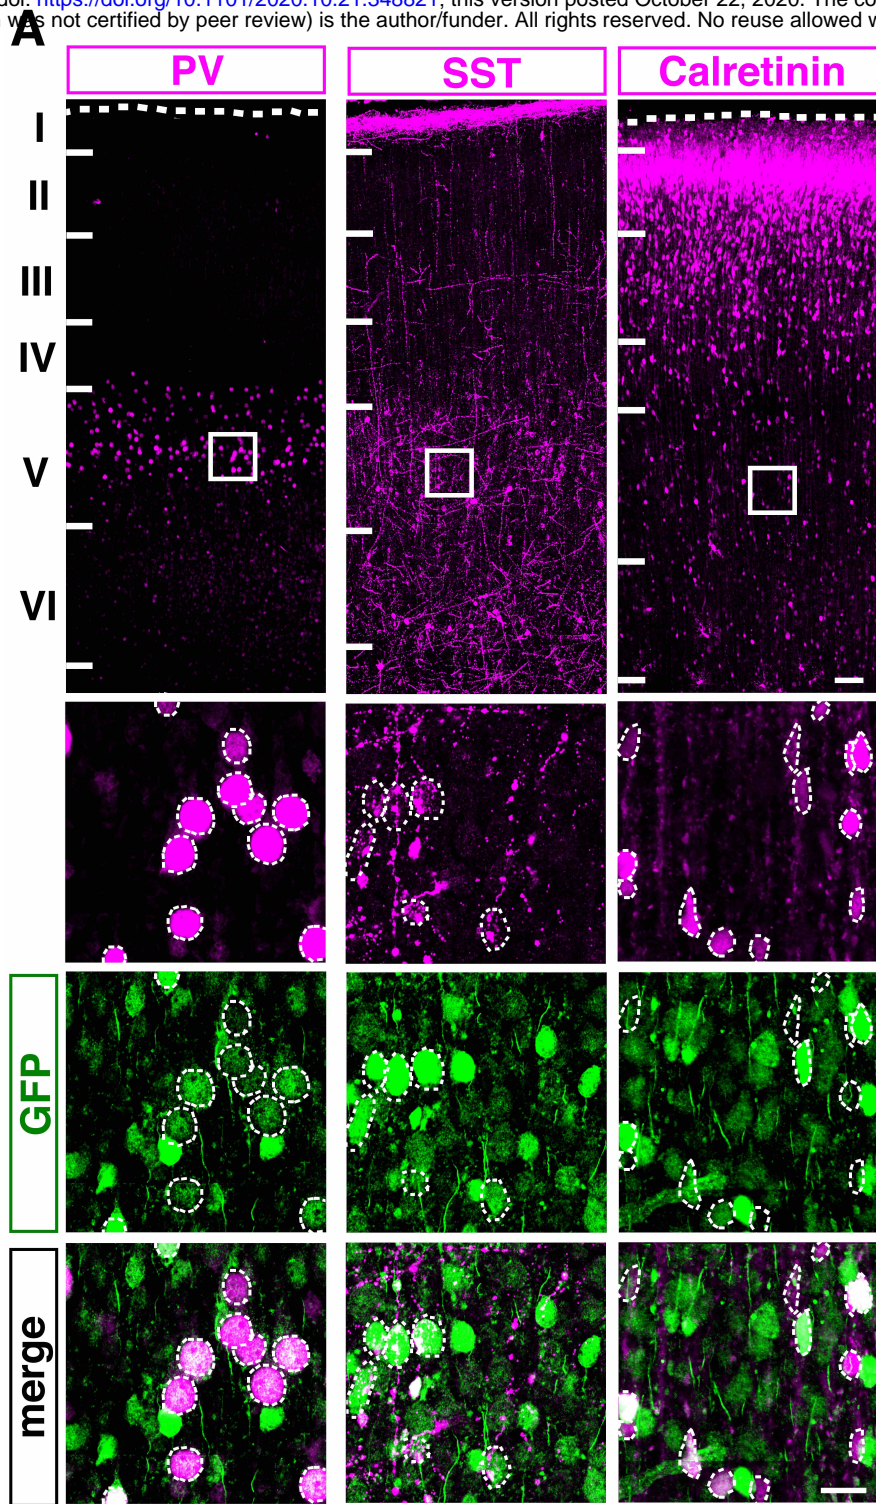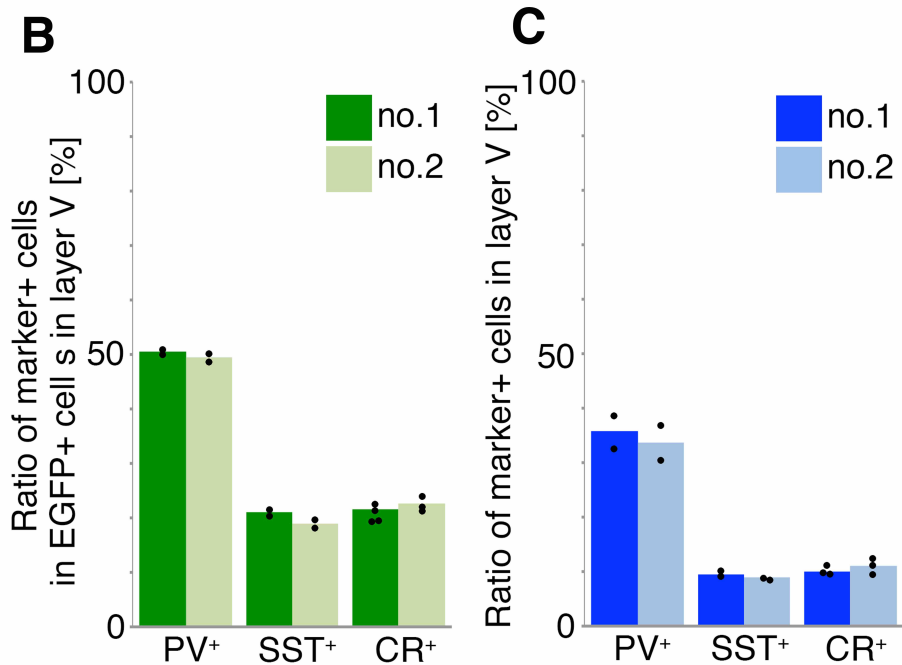

## Supplementary Information

### The polymicrogyria-associated *GPR56* promoter preferentially drives gene expression in developing GABAergic neurons in common marmosets

Ayako Y Murayama<sup>1,2</sup>, Ken-ichiro Kuwako<sup>1,3</sup>, Junko Okahara<sup>2,4</sup>, Byoung-Il Bae<sup>5,†</sup>, Misako Okuno<sup>2</sup>, Hiromi Mashiko<sup>6,††</sup>, Tomomi Shimogori<sup>6</sup>, Christopher A Walsh<sup>5,7,8</sup>, Erika Sasaki<sup>2,4</sup>, Hideyuki Okano<sup>1,2</sup>

1. Department of Physiology, Keio University School of Medicine, Tokyo, Japan
2. Laboratory for Marmoset Neural Architecture, Center for Brain Science, RIKEN, Wako, Japan
3. Department of Neural and Muscular Physiology, Shimane University School of Medicine, Izumo, Japan
4. Center Institute of Experimental Animals, Kawasaki, Japan
5. Division of Genetics and Genomics, Manton Center for Orphan Disease Research, and Howard Hughes Medical Institute, Boston Children's Hospital, Boston, MA, USA.
6. Laboratory for Molecular Mechanisms of Brain Development, Center for Brain Science, RIKEN, Wako, Japan
7. Broad Institute of MIT and Harvard, Cambridge, MA, USA.
8. Departments of Pediatrics and Neurology, Harvard Medical School, Boston, MA, USA.

**Supplementary Figure S1.** Alignment of 0.3 Kbp e1m sequence of human, marmoset, and mouse. Bases that differ from human sequence are shown in black. The percentages at the end of each sequence indicate the identity to the human sequence. The 15-bp elements are enclosed in orange squares.

```

human      CCCC-ATAAA---TCGCTGTCCTAACCCCTGCCCTCCCTCCTGCCAGCTCCCTGT--CTGGCCCTGGGCAGCGTCTGAGTT
marmoset   CCCG-ATAAG---TCACCATCCTAAGCCCTGTCTCCCTCCTGCCAGCTGCCTAT--CTGGCCCTGGGCAGCGTCTGAGTT
mouse      CTAGGACCCGTTCTCTCGAGTGTGAACCCAGC--TTGTCCCTGCTAGTAACTGCTTTAGCCCAGGCAGCCTCAGGACG

human      GA-GG-----ACTTGGGAACAGGACAAGTTACGGAGCCACGTTGCTTTGCTGGGTCTGAGCCGGGGTGTGACGTAAGTCC
marmoset   GA-GG-----TCTTGGGCACAGGACAAGTTACGGAGCCACATTGCTTTGCTGGGTCTGAGCCGAGCTGTGACGTAAGTCC
mouse      AAAGCTCTCACGCTTGGGTACA-GACAAGTTGGAGAGCCC----G---CGC----TGTAAGCCAGGCAGTGAACGAGTCC

human      CTGCAGCTGCCAACGGTTGCCAGGGCAACGGTTGCCAGGGCTGCTGTGTCACCTGCGCCCTTCT-----CCCGCGCTGG
marmoset   CTGCAGCTGCCAACAGTTGCCAGGGCAACGGTTGCTAGGGCTGCTGTGTCACCTGCGCCCTTCT-----CTGGAGCTGG
mouse      ATGCAGCTGCCAACGGTTGCCAGGGGAACGGTTGCCAGGGCTGCTGTGTCACCTGCGCCCTTCTCTCCCTTGGCGCTGG

human      CGGCTGGGGCTTCTCAGCCTCTATTCCCTGGCTGTCCCTTTGTTTGAAGCTCCAGTGAGGGAGCAGTGGCTGGG-----
marmoset   CGGCTGCGGCTTCTCAGCCTC--TTCCCTGGCTGTCCCTTTGTTTGGAGCTCCAGTGAGGGAGCAGTGGCTGGG-----
mouse      AGGCCCGGGCTTCTCAGCT-CAGCTTCCCGCTGCCCCCTTTGTTTGAAGCCCTAGTAAGGGGATGTTGACTGGGGGGG

human      --GTG-----GCCAGCTTCAAAGT 100.0%
marmoset   --GTA-----GCCAGCTTCAAAGT 92.4%
mouse      GGGTAAGGGGGACCCAGGCTTTCATT 62.1%

```

**Supplementary Figure S2. (A)** Bright field images of marmoset early embryos cultured in vitro for 2 (a), 4 (b), 6 (c), or 7 (d) days after lentivector infection. (e) The image of green fluorescence field of (c). *hGPR56 e1m* promoter did not work 7-day cultured early embryos. Scale bar = 100  $\mu$  m. **(B)** Genome integration analysis by fluorescence in situ hybridization. The karyograms were prepared from the peripheral blood cells of each founder marmosets, I651TgF and I757TgM. Two sets of the chromosomes from each marmoset are shown as the representatives; #005 and #007 from I651TgF. #0008 and #022 from I757TgM.

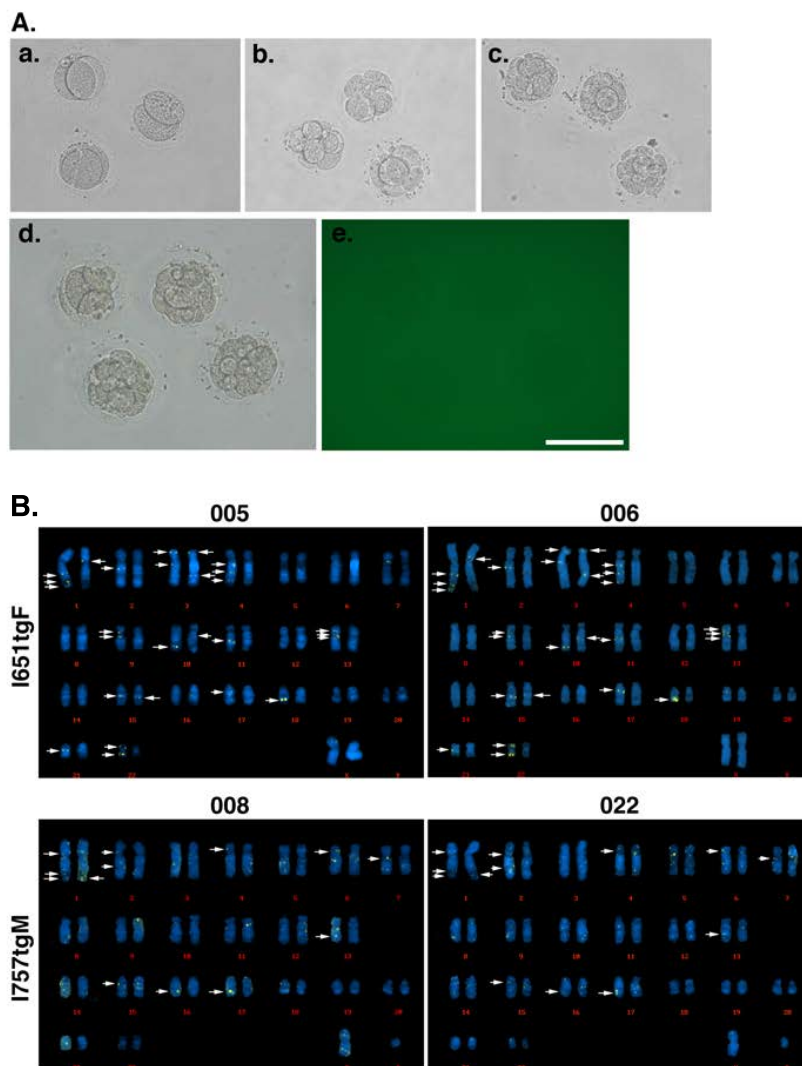

**Supplementary Figure S3.** (A) Brains of the E95 fetuses (no.2 and no.3) derived from I651TgF were observed for EGFP fluorescence. Lateral view of the whole brain is shown. Frontal lobe (FL), temporal lobe (TL), cerebral cortex (Cx), midbrain (MB), cerebellum (Cb) and olfactory bulb (OB) are indicated. Scale bar = 1 mm. (B) EGFP fluorescence (green) and immunohistochemistry for GFP (magenta) of the cerebral cortex at E126. DNA was counterstained with Hoechst (blue). Scale bar = 50  $\mu$ m. (C) Detection of genomic integration of transgene by genomic PCR. Genomic DNA prepared from sperm of I757TgM or wild-type marmoset ES cells (negative control), and pEGFP plasmid (positive control) was used as a template.

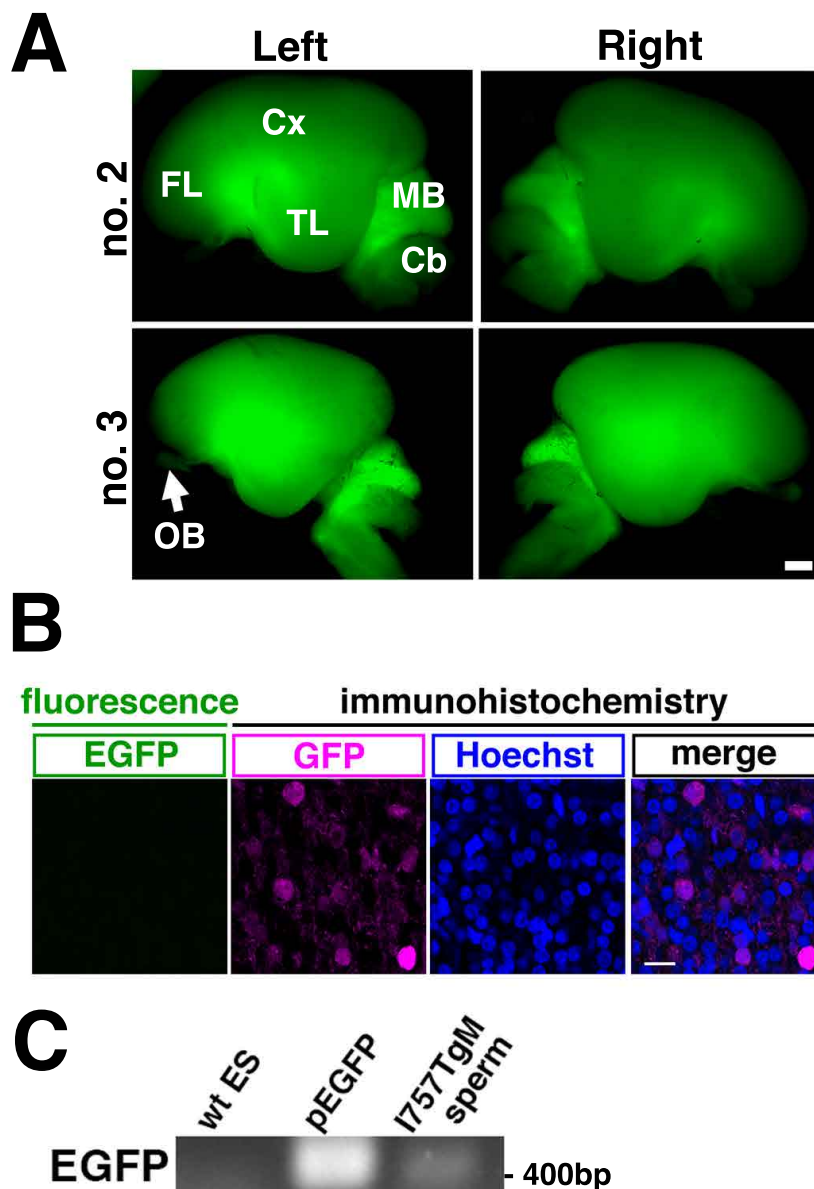

**Supplementary Figure S4.** Expression of *GPR56* mRNA in the brain of wild type marmoset embryo. Coronal sections of marmoset brain at the (A) 10<sup>th</sup> and (B) 12<sup>th</sup> embryonic week (EW) are hybridized with anti-sense probe for *GPR56* mRNA. Scale bar = 1 mm. Lines on the schema indicate the position of each section.

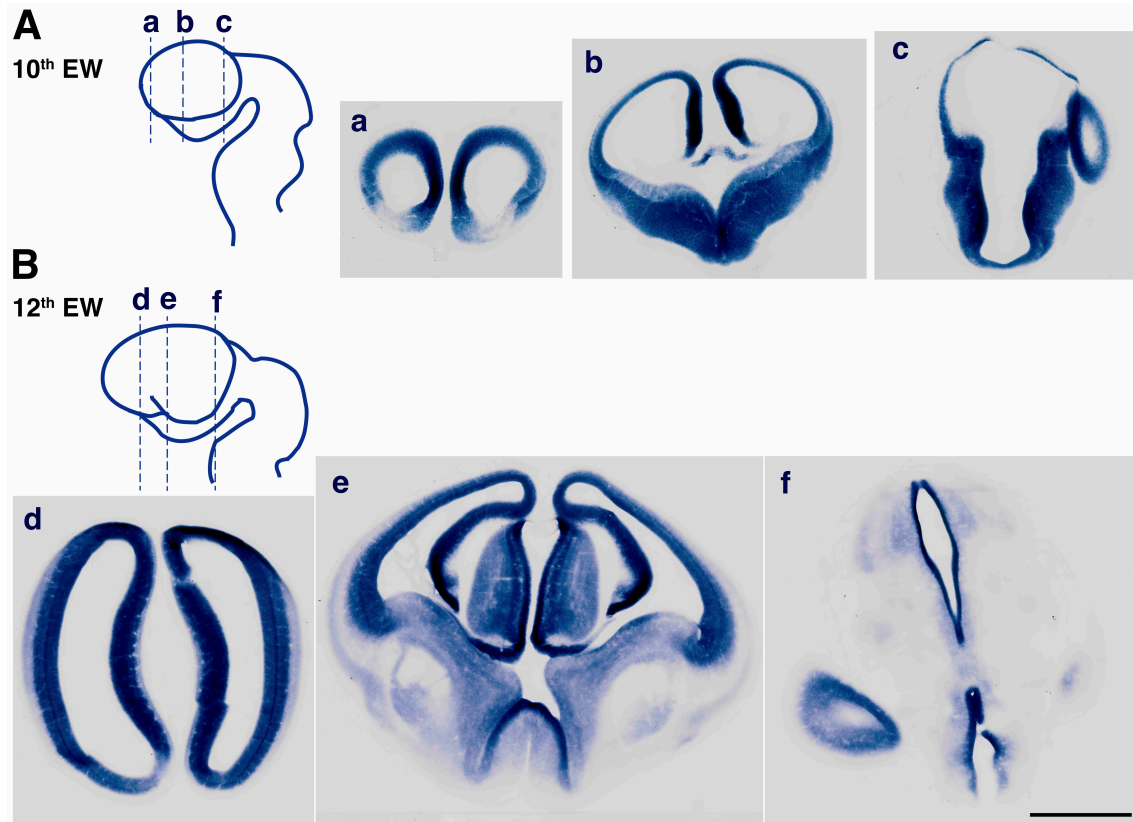

**Supplementary Figure S5.** COS cells transfected with HA-tagged marmoset GPR56 expression vector were fixed and stained with anti HA-Tag antibody (magenta), anti pan-GPR56 antibody (green), and Hoechst (blue). Scale bar = 50  $\mu$ m.

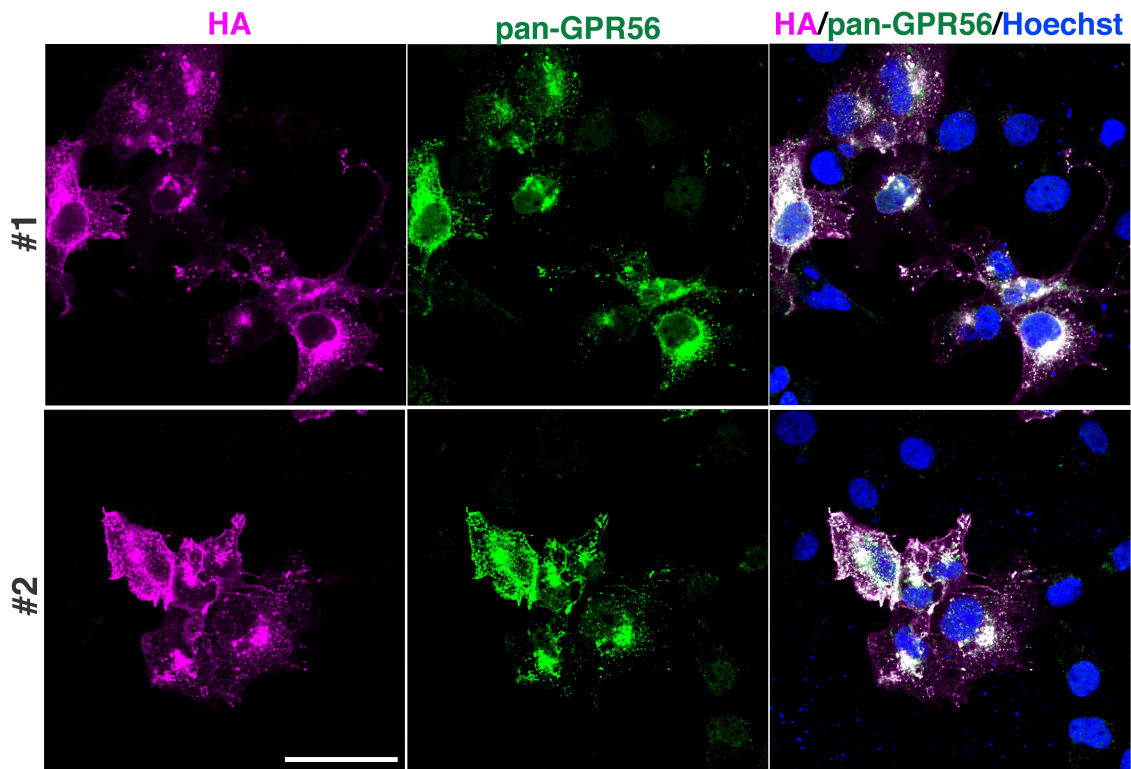

**Supplementary Figure S6 (related to Figure 4C).** (A) Orthogonal views of *hGPR56* *e1m*-EGFP positive (magenta) and pan-GPR56 positive (green) cells in Figure 4C, excluding the one whose orthogonal view image is shown in Figure 4C. Upper (a) and Lower (b) panels correspond to the Figure 4C a and b, respectively. The left most panels are identical to the GFP panels shown in Figure 4C, but *e1m* EGFP positive cells are numbered. The cell No. 1 is identical to the cell marked by the arrow in Figure 4C. Z-stack position of each orthogonal view panels is shown in parenthesis. Asterisk indicates blood vessel. (B) Serial z-sections showing the expression of each marker. Orthogonal views and serial z-sections were obtained using ZEN 2009 software (version: 6.0.0.303, Carl Zeiss, Oberkochen, Germany). Scale bars = 10 $\mu$ m.

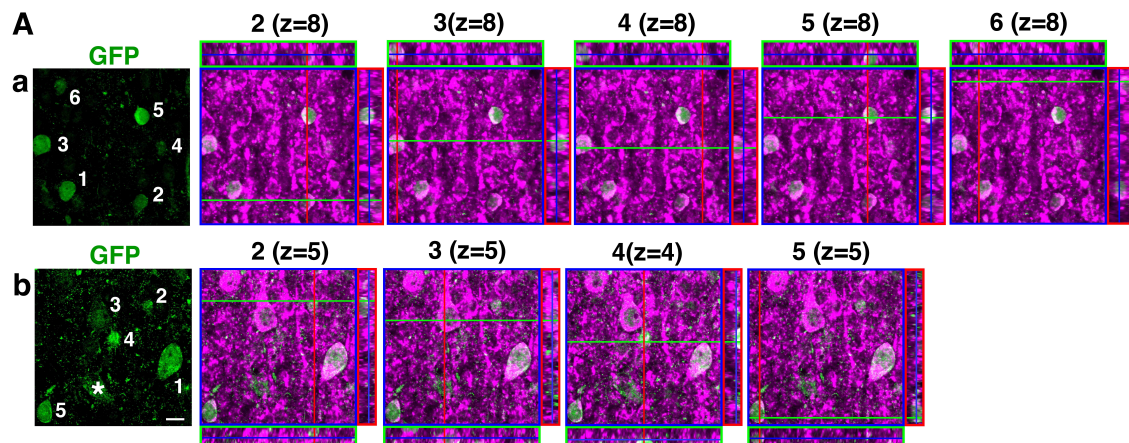



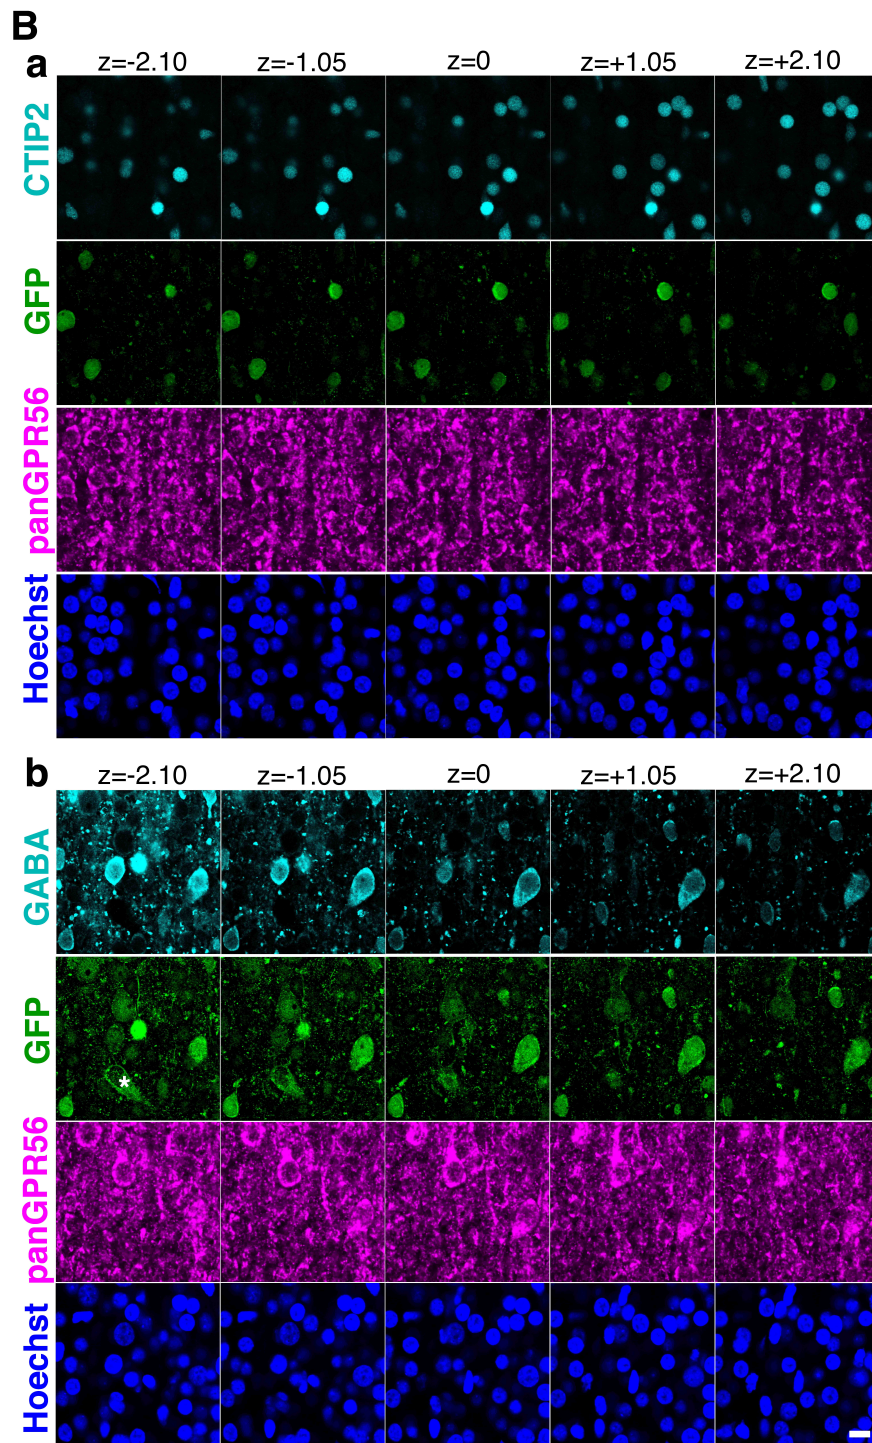

**Supplementary Figure S7. (A)** Ratio of GABA<sup>+</sup> cells among the *hGPR56 elm*-driven EGFP<sup>+</sup> (green) or pan-GPR56<sup>+</sup> cells (magenta) in each layer of the cerebral cortex of transgenic marmoset no.1 (dark colors) and no.2 (light colors).

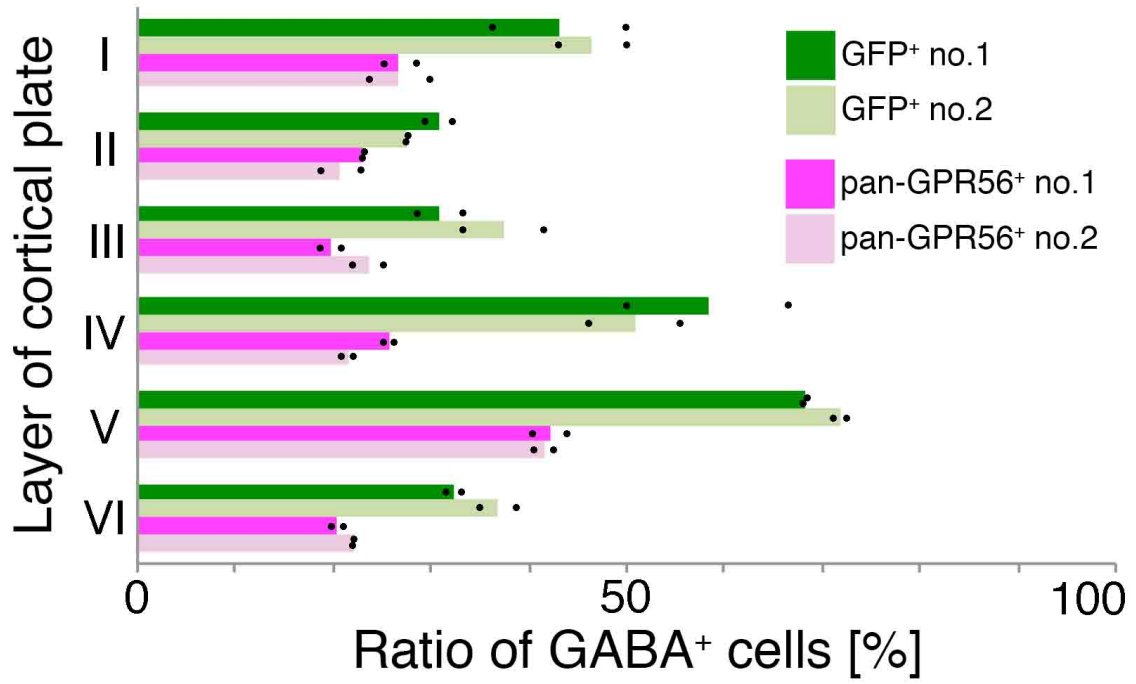

**Supplementary Figure S8.** (A) Immunofluorescent staining of coronal section of the marmoset brain at E89 for Nkx2.1 and GPR56. Cerebral cortex (Cx), stratum (St), presumptive lateral ganglionic eminence (pLGE) and presumptive medial ganglionic eminence (pMGE) are indicated. Scale bar = 200 $\mu$ m. (B) Migrating neurons expressing *hGPR56 e1m*-driven EGFP (arrows) in the cerebral cortex of the transgenic marmoset at E95. Subventricular zone (SVZ), intermediate zone (IZ) and caudate (Cd) are indicated. Enlarged image of the area marked by a square in panel a (scale bar=50 $\mu$ m) is shown in panel b (scale bar=100 $\mu$ m).

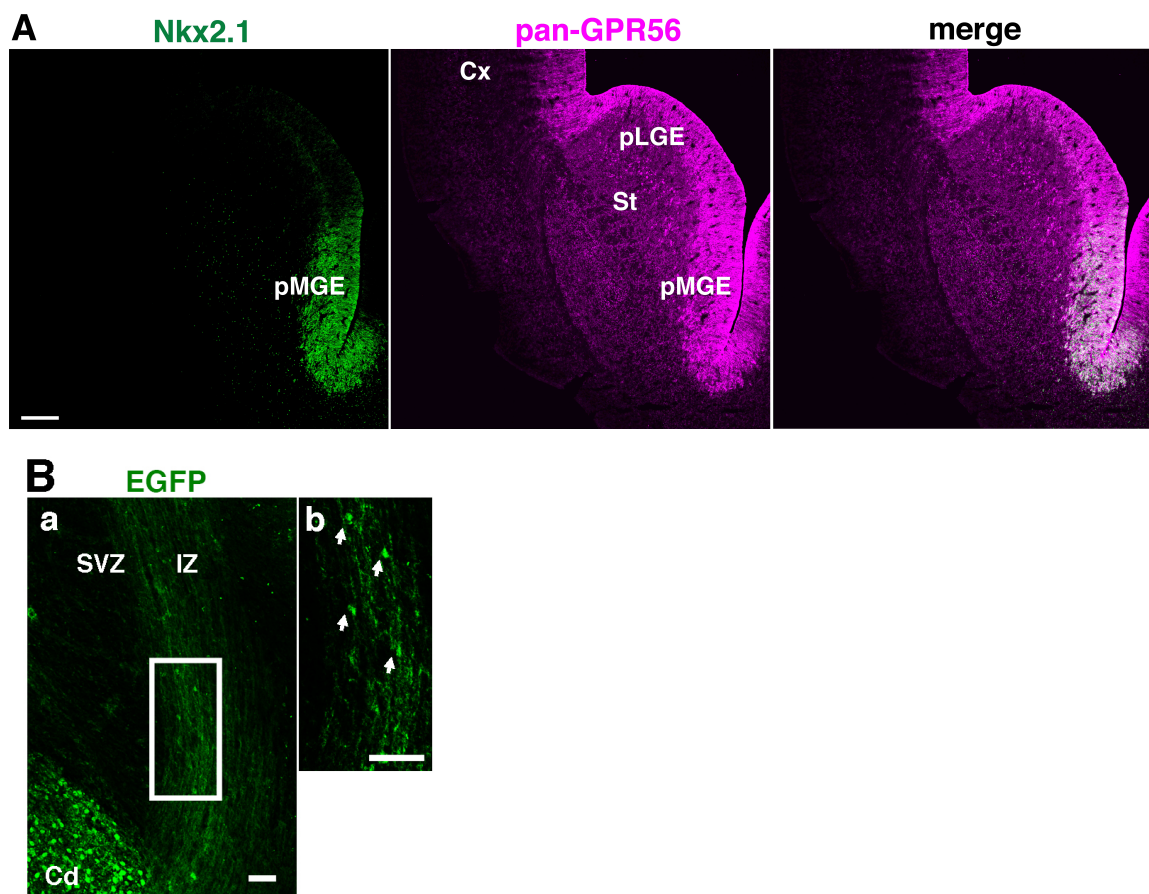

**Supplementary Figure S9. (A) Gels scan data of Fig. 1C (a) and 1D (b and c). (B) Gel scan data of Fig. S3C.**

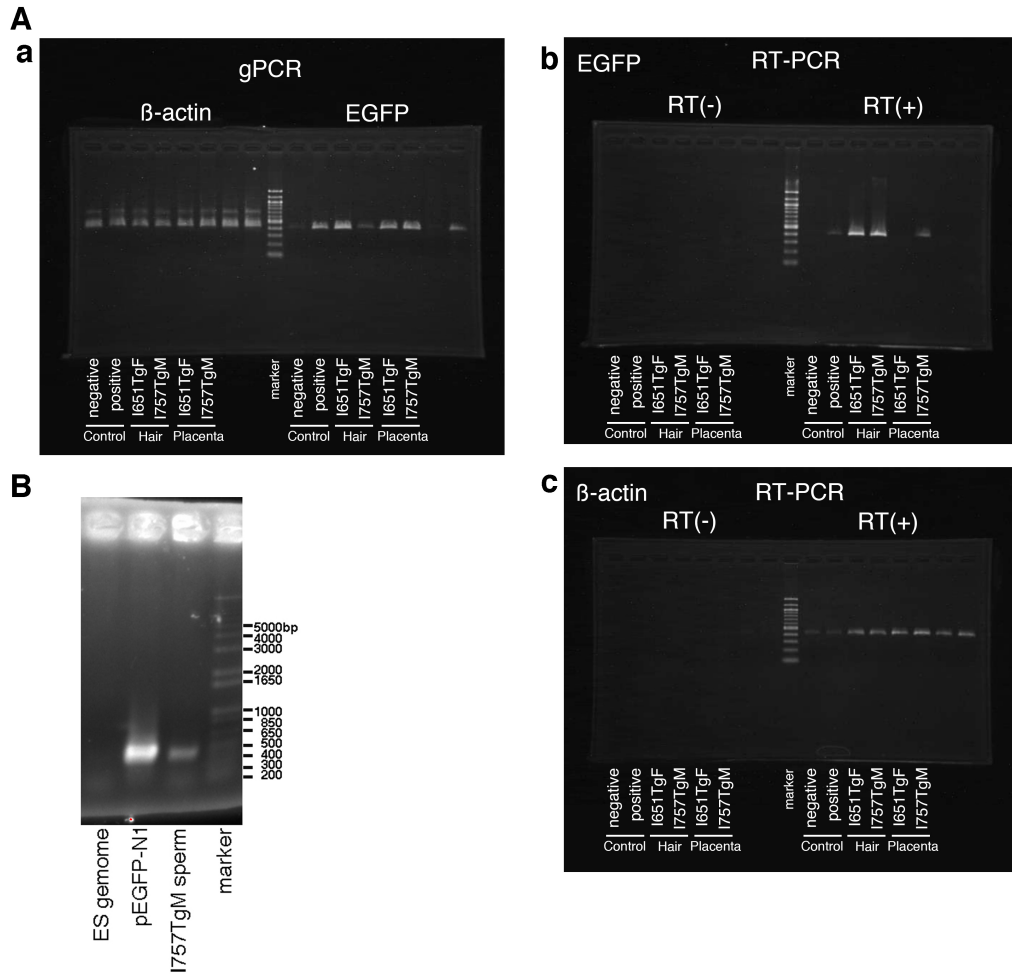

**Supplementary Table S1.** The percentage of *hGPR56 e1m*-EGFP+ cells in each layer.

Roman numerals are the number of each layer. The number in the parentheses is the number of sections analyzed.

| individual no. |          | I   | II   | III  | IV  | V    | VI   |
|----------------|----------|-----|------|------|-----|------|------|
| no.1 (12)      | mean [%] | 5.3 | 17.7 | 16.3 | 7.4 | 31.0 | 22.3 |
|                | STDEV    | 1.4 | 2.2  | 1.5  | 3.1 | 1.0  | 2.7  |
|                | SEM      | 0.4 | 0.6  | 0.4  | 0.9 | 0.3  | 0.8  |
| no.2 (13)      | mean [%] | 5.7 | 18.5 | 15.7 | 7.0 | 31.5 | 21.5 |
|                | STDEV    | 2.0 | 2.1  | 2.8  | 2.3 | 1.0  | 2.2  |
|                | SEM      | 0.6 | 0.6  | 0.8  | 0.6 | 0.3  | 0.6  |

**Supplementary Table S2.** The percentage of CTIP2 or GABA immunolabeled neurons among the pan-GPR56 or *hGPR56 e1m*-EGFP expressing neurons in layer V. Dash means no data.

| individual no. |                                                  | pan-GPR56     |               | GFP          |               |
|----------------|--------------------------------------------------|---------------|---------------|--------------|---------------|
|                |                                                  | Ctip2         | GABA          | Ctip2        | GABA          |
| no.1           | % of each sections                               | 45.8 (71/155) | 40.4 (59/146) | 27.3 (27/99) | 68.36 (67/98) |
|                | (Ctip2+ or GABA+ cells/pan=GPR56+ or GFP+ cells) | 49.7 (79/159) | 37.9 (44/116) | 25.3 (23/91) | 68.0 (51/75)  |
|                |                                                  | -             |               | 31.3 (10/32) | -             |
|                |                                                  | -             |               | 30.2 (13/43) | -             |
|                | % mean                                           | 47.8          | 39.2          | 28.5         | 68.2          |
| no.2           | % of each sections                               | 52.6 (71/135) | 40.4 (57/141) | 23.5 (20/85) | 71.3 (67/94)  |
|                | (Ctip2+ or GABA+ cells/pan-GPR56+ or GFP+ cells) | 51.0 (50/98)  | 42.6 (63/148) | 25.8 (16/62) | 72.5 (66/91)  |
|                |                                                  | 51.0 (51/100) | -             | 28.8 (17/59) | -             |
|                |                                                  | 47.2 (42/89)  | -             | 28.3 (17/60) | -             |
|                |                                                  | -             | -             | 30.2 (13/43) | -             |
|                |                                                  | -             | -             | 29.4 (10/34) | -             |
|                | % mean                                           | 50.5          | 41.5          | 27.7         | 71.9          |
| total % mean   |                                                  | 49.1          | 40.3          | 28.1         | 70.0          |

**Supplementary Table S3.** The percentage of GABA+ cells that coexpress *hGPR56e1m*-EGFP in each layer. Dash means no data.

| layer                     |                                                | I           | II           | III         | IV         | V           | VI          |
|---------------------------|------------------------------------------------|-------------|--------------|-------------|------------|-------------|-------------|
| no.1                      | % in each sections (GABA+ cells / EGFP+ cells) | 36.4 (4/11) | 32.3 (10/31) | 33.3 (6/18) | 50(5/10)   | 68.4(67/98) | 33.3(10/30) |
|                           |                                                | 50.0 (1/2)  | 29.4(5/17)   | 28.6(2/7)   | 66.7(2/3)  | 68.0(51/75) | 31.6(6/19)  |
|                           | % mean                                         | 43.2        | 30.8         | 31.0        | 58.3       | 68.2        | 32.5        |
| no.2                      | % in each sections (GABA+ cells / EGFP+ cells) | 50.0 (3/6)  | 27.8 (5/18)  | 41.7 (5/12) | 55.6(5/9)  | 71.3(67/94) | 35.0(7/20)  |
|                           |                                                | 42.8(3/7)   | 27.6(8/29)   | 33.3 (7/21) | 46.2(6/13) | 72.5(66/91) | 38.9(14/36) |
|                           | % mean                                         | 46.4        | 27.7         | 37.5        | 50.9       | 71.9        | 36.9        |
| total % mean              |                                                | 44.8        | 29.3         | 34.2        | 54.6       | 70.1        | 34.7        |
| total counted cell number |                                                | 26          | 85           | 58          | 35         | 334         | 105         |

**Supplementary Table S4.** The percentage of GABA+ cells that coexpress pan-GPR56 in each layer. Dash means no data.

| layer                     |                                                     | I           | II          | III         | IV         | V            | VI          |
|---------------------------|-----------------------------------------------------|-------------|-------------|-------------|------------|--------------|-------------|
| no.1                      | % in each sections (GABA+ cells / pan-GPR56+ cells) | 28.6 (4/14) | 23.3 (7/30) | 18.8(6/32)  | 26.3(5/19) | 40.4(59/146) | 19.6(11/56) |
|                           |                                                     | 25(2/8)     | 23.1 (6/26) | 20.8 (5/24) | 25(2/8)    | 37.9(44/116) | 21.2(7/33)  |
|                           | % mean                                              | 26.8        | 23.2        | 19.8        | 25.7       | 42.2         | 20.4        |
| no.2                      | % in each sections (GABA+ cells / pan-GPR56+ cells) | 30.0 (3/10) | 18.8 (3/16) | 22.2 (6/27) | 22.2(6/27) | 40.4(57/141) | 22.2(8/36)  |
|                           |                                                     | 23.1(3/13)  | 22.9(8/35)  | 25.0 (8/32) | 20.7(6/29) | 42.6(63/148) | 22.0(13/59) |
|                           | % mean                                              | 26.5        | 20.8        | 23.6        | 21.5       | 41.5         | 22.1        |
| total % mean              |                                                     | 26.7        | 22.0        | 21.7        | 23.6       | 41.9         | 21.3        |
| total counted cell number |                                                     | 45          | 91          | 115         | 75         | 551          | 184         |

**Supplementary Table S5.** The percentage of PV, SST and CR immunolabeled neurons among the *hGPR56 e1m*-EGFP+ cells in layer V. Dash means no data.

| individual no.            |                             | <b>PV+</b>   | <b>SST+</b>  | <b>CR+</b>   |
|---------------------------|-----------------------------|--------------|--------------|--------------|
| no.1                      | % in each sections          | 50.0 (16/32) | 20.4 (10/49) | 19.4 (7/36)  |
|                           | (Marker+ cells/EGFP+ cells) | 51.2 (22/43) | 21.6 (11/51) | 19.6 (9/46)  |
|                           |                             | -            | -            | 23.5 (8/34)  |
|                           |                             | -            | -            | 22.7 (10/44) |
|                           | % mean                      | 50.6         | 21.0         | 21.3         |
| no.2                      | % in each sections          | 48.8 (21/43) | 18.5 (12/65) | 23.9 (11/46) |
|                           | (Marker+ cells/EGFP+ cells) | 50.0 (17/34) | 19.7 (14/71) | 22.1 (15/68) |
|                           |                             | -            | -            | 21.3 (10/47) |
|                           |                             |              |              |              |
|                           | % mean                      | 49.4         | 19.1         | 22.4         |
| total % mean              |                             | 50.0         | 20.0         | 21.9         |
| total counted cell number |                             | 152          | 236          | 321          |



**Supplementary Table S6.** The percentage of PV, SST and CR neurons in layer V. Dash means no data.

| individual no.            |                                                  | <b>PV+</b>    | <b>SST+</b> | <b>CR+</b>  |
|---------------------------|--------------------------------------------------|---------------|-------------|-------------|
| no.1                      | % in each sections (Marker+ cells/counted cells) | 32.5 (37/114) | 10.0 (5/50) | 11.1 (7/63) |
|                           |                                                  | 38.7 (55/142) | 9.4 (5/53)  | 9.9 (8/81)  |
|                           |                                                  | -             | -           | -           |
|                           |                                                  | -             | -           | 9.7 (6/62)  |
|                           | % mean                                           | 35.6          | 9.7         | 10.2        |
| no.2                      | % in each sections (Marker+ cells/counted cells) | 30.4 (35/115) | 8.8 (5/57)  | 12.3 (8/65) |
|                           |                                                  | 37.0 (37/100) | 8.6 (5/58)  | 11.1 (8/72) |
|                           |                                                  | -             | -           | 9.7 (6/62)  |
|                           |                                                  |               |             |             |
|                           | % mean                                           | 33.7          | 8.7         | 11.0        |
| total % mean              |                                                  | 34.7          | 9.2         | 10.6        |
| total counted cell number |                                                  | 471           | 218         | 405         |
